1 ***JUN* upregulation drives aberrant transposable element mobilization, associated innate immune**  
2 **response, and impaired neurogenesis in Alzheimer's disease**

3  
4 Chiara Scopa<sup>1,2\*</sup>, Samantha M. Barnada<sup>1</sup>, Maria E. Cicardi<sup>2</sup>, Mo Singer<sup>2</sup>, Davide Trotti<sup>2,#</sup> and  
5 Marco Trizzino<sup>1,3,\*#</sup>

6  
7 <sup>1</sup>Department of Biochemistry and Molecular Biology, Thomas Jefferson University,  
8 Philadelphia, PA, USA

9 <sup>2</sup>Jefferson Weinberg ALS Center, Vickie and Jack Farber Institute for Neuroscience,  
10 Department of Neuroscience, Thomas Jefferson University, Philadelphia, PA, USA

11 <sup>3</sup> Department of Life Sciences, Imperial College London, London, UK

12 # Co-lead authors (equal contribution)

13 Corresponding authors: Marco Trizzino ([m.trizzino@imperial.ac.uk](mailto:m.trizzino@imperial.ac.uk)) and Chiara Scopa  
14 ([chiara.scopa@jefferson.edu](mailto:chiara.scopa@jefferson.edu))

15

16

17 **Abstract**

18

19 Adult neurogenic decline, inflammation, and neurodegeneration are phenotypic hallmarks of  
20 Alzheimer's disease (AD). Mobilization of transposable elements (TEs) in heterochromatic  
21 regions was recently reported in AD, but the underlying mechanisms are still  
22 underappreciated. Combining functional genomics with differentiation of familial and  
23 sporadic AD patient derived-iPSCs into hippocampal progenitors, CA3 neurons, and cerebral  
24 organoids, we found that upregulation of the AP-1 subunit c-JUN triggers decondensation of  
25 genomic regions containing TEs. This leads to cytoplasmic accumulation of TE-derived RNA-  
26 DNA hybrids, activation of the cGAS-STING cascade, and increased cleaved caspase-3 levels,  
27 suggesting initiation of programmed cell death in progenitor cells and neurons. Notably,  
28 inhibiting c-JUN effectively blocks all the downstream molecular processes and rescues  
29 neuronal death and impaired neurogenesis in the AD progenitors. Our findings open new  
30 avenues for identifying therapeutic strategies and biomarkers to counteract disease  
31 progression and diagnose AD in the early, pre-symptomatic stages.

32

33 **Keywords:** Alzheimer's disease, chromatin relaxation, JUN, retrotransposons, RNA-DNA  
34 hybrids, cGAS-STING

35

36

37

38

## 39 Introduction

40 Alzheimer's disease (AD), the most frequent cause of dementia<sup>1-3</sup>, is an age-related  
41 neurodegenerative disorder characterized by progressive memory loss and decline of  
42 cognitive functions. AD's histopathological hallmarks include extracellular Amyloid beta (A $\beta$ )  
43 plaques and intracellular neurofibrillary TAU tangles (NFTs)<sup>4</sup>. One of the first brain regions to  
44 show these pathological features is the hippocampus<sup>5</sup>. The subgranular zone of the dentate  
45 gyrus within the hippocampus is a human neurogenic niche<sup>6-8</sup> which harbors neural stem cells  
46 and controls cell fate determination<sup>9</sup>. Interestingly, defects in adult hippocampal  
47 neurogenesis are associated with various neurodegenerative disorders, including AD<sup>10-13</sup>.

48 Several studies report alterations in hippocampal neurogenesis in transgenic animal  
49 models of AD<sup>12</sup> and an exacerbated decline of adult neurogenesis in AD patients<sup>14,15</sup>. Notably,  
50 these alterations occur in the early stages of the disease<sup>12</sup>, suggesting they play a role in  
51 triggering the onset of the disease's clinical phenotypes. Impaired neurogenesis likely  
52 accelerates and facilitates neurodegenerative progression<sup>16</sup>. Moreover, these studies  
53 highlight the link between the key molecules of AD (i.e. TAU and A $\beta$ ) and neurogenesis. TAU  
54 is involved in the microtubule dynamics required for axonal outgrowth and plays an essential  
55 role in hippocampal neurogenesis<sup>17</sup>. Recent studies indicate that TAU hyperphosphorylation  
56 impairs hippocampal neurogenesis<sup>18,19</sup>.

57 Increasing evidence suggests that intracellular accumulation of A $\beta$  also negatively  
58 impacts neural precursors cell (NPC) proliferation and neuronal differentiation during  
59 hippocampal neurogenesis<sup>20-22</sup>. Additionally, neural stem cell (NSC) fate determination, and  
60 therefore neurogenesis, is regulated by MAP kinases<sup>23-26</sup>. Interestingly, several studies  
61 suggest a compelling link between MAPK signaling and AD pathogenesis, revealing that the c-  
62 JUN-amino-terminal kinase (JNK) pathway is involved in A $\beta$ -induced neurodegeneration<sup>27-30</sup>  
63 and in the hyperphosphorylation of TAU contributing to the formation of the NFTs<sup>31-33</sup>.  
64 Importantly, c-JUN is the downstream effector of the JNK pathway.

65 Phospho-c-JUN is a fundamental member of the AP-1 family of transcription factors,  
66 functioning as either homodimers (c-JUN/c-JUN) or as heterodimers (c-JUN/c-FOS, c-  
67 JUN/ATF2, c-JUN/MAF)<sup>34</sup>. Among various other functions, AP-1 modulates cell death  
68 signals<sup>31,32</sup> and promotes the transcription of a series of pro-apoptotic factors, such as TNF- $\alpha$ ,  
69 FAS-L, c-MYC and ATF3, which induce cell death by apoptosis<sup>31-33</sup>. Recent lines of evidence  
70 suggests that AP-1 can act as a pioneer factor by binding condensed nucleosomes and

71 recruiting the BAF complex to elicit chromatin accessibility<sup>35–37</sup>. Notably, upregulation of *JUN*  
72 (which encodes for c-JUN) has been detected in many neurodegenerative diseases, including  
73 AD<sup>32,38</sup>. Nonetheless, the link between aberrant c-JUN activity and the associated  
74 neurodegenerative outcomes have not been explored in depth.

75 Finally, there is mounting evidence indicating a role for transposable elements (TEs)  
76 in the molecular pathogenesis of AD. More specifically, the disease is characterized by  
77 aberrant de-repression and mobilization of TEs found in regions of repressed chromatin,  
78 particularly retrotransposons belonging to the long interspersed nuclear elements (LINEs) and  
79 long terminal repeat containing transposons (LTRs)<sup>39–46</sup>. Yet, the mechanisms leading to TE  
80 de-repression and the functional consequences of this phenomenon in AD pathogenesis are  
81 understudied, especially in humans.

82 In this study, we leveraged familial and sporadic AD patient-derived induced  
83 pluripotent stem cells (iPSCs) and differentiated them into hippocampal progenitors, CA3  
84 neurons and cerebral organoids. We demonstrated that c-JUN is the upstream regulator of  
85 the transcriptional network altered in AD hippocampal progenitors, and that the aberrant  
86 upregulation of *JUN* leads to the de-repression and mobilization of hundreds of TEs.  
87 Moreover, we found that aberrant TE mobilization induces a cytoplasmic accumulation of  
88 RNA-DNA hybrids, which elicits the activation of the cGAS-STING pathway and, ultimately,  
89 activation of caspase-3, suggesting the initiation of programmed cell death. Inhibiting c-JUN  
90 phosphorylation blocks this cell-death axis in AD progenitors by maintaining TE repression,  
91 ultimately preventing the activation of the downstream pathogenic cascade.

92

## 93 **Results**

94

### 95 **iPSC-derived model of human neurogenesis in familial Alzheimer’s disease**

96 To investigate the role of c-JUN in the onset of Alzheimer’s disease (AD), we started  
97 from familial AD and then replicated our findings in sporadic AD. Specifically, we derived  
98 hippocampal precursor neurons from AD patients and control human iPSCs. First, we  
99 confirmed the pluripotent state and the expression of *JUN* (which encodes the c-JUN protein)  
100 in two control (CTRL1 and CTRL2) and two familial AD lines (FAD1 and FAD2). CTRL and FAD  
101 lines included both sexes and were derived from individuals of comparable age. The FAD1 cell

102 line contains an *APP* gene duplication and the FAD2 line contains a heterozygous missense  
103 mutation in *PSEN2* (*PSEN2*: p.Asn141Ile).

104 The immunofluorescence analysis for the pluripotency markers, NANOG and OCT4,  
105 and the immunofluorescence for c-JUN showed that the fraction of cells expressing these  
106 markers was not significantly different between CTRL and AD lines, indicating that the AD  
107 lines are pluripotent and they have the same percentage of JUN expressing cells than the  
108 control lines (**Extended Data Fig. 1a, b**). However, FAD iPSCs showed higher expression levels  
109 of c-JUN (**Extended Data Fig. 1b**).

110 We then differentiated the four iPSC lines (CTRL1, CTRL2, FAD1, and FAD2) to  
111 hippocampal neural precursor cells (hpNPCs) using a previously published protocol (**Fig. 1a**)<sup>47</sup>.  
112 To assess the composition of the obtained hpNPC population, we quantified the expression  
113 of the established markers for different hippocampal neural precursor stages via qPCR (Fig.  
114 1b). NESTIN defines early precursors, TBR2 and FOXG1 define intermediate progenitors,  
115 PROX1 defines late progenitors, and DCX defines neuroblasts<sup>48</sup> (**Fig. 1b**). We observed that  
116 the FAD hpNPCs have impaired neurogenesis, indicated by a robust reduction of early neural  
117 stem cells (NSCs; NESTIN-positive cells) and a substantial increase in TBR2- and FOXG1-  
118 positive intermediate progenitors (**Fig. 1b**). This result was also confirmed by  
119 immunofluorescence (**Fig. 1c, d**). Moreover, the FAD hpNPCs failed to properly differentiate  
120 into neuroblasts (**Fig. 1b, d**), demonstrated by the significantly reduced expression of the  
121 neuroblast marker, DCX, as well as the reduced percentage of the DCX positive cells (**Fig. 1c**).

122

### 123 ***JUN* regulates the transcriptional network dysregulated in familial Alzheimer's disease** 124 **hippocampal neural progenitors**

125 To further investigate the differences between healthy and FAD hippocampal neural  
126 progenitors, we characterized their transcriptomes using RNA-sequencing (RNA-seq). After  
127 20 days in proliferation medium, we collected the cells to perform RNA-seq. This analysis  
128 identified 1,976 differentially expressed genes, 751 of which (38.1%) were downregulated,  
129 and 1,225 (61.9%) were upregulated in the FAD progenitors (FDR <5%; log<sub>2</sub>(FC)  $\pm$  1.5; **Fig. 2a**).  
130 In agreement with RT-qPCR and immunofluorescence data (**Fig. 1**), the early progenitor  
131 markers, *NESTIN* and *PAX6*, were downregulated, confirming the impaired  
132 neurogenesis in FAD progenitors.

133 Several studies have demonstrated a critical role for WNT signaling in the  
134 pathogenesis of AD<sup>49–55</sup> and in the regulation of adult hippocampal neurogenesis<sup>56–63</sup>.  
135 Accordingly, the expression of several genes involved in both the canonical (*DKK3*, *WNT7A*,  
136 *SFRP4*, *WNT2*) and non-canonical (*WNT5A*, *RORA*, *RAC2*) WNT signaling pathways were  
137 upregulated in FAD hpNPCs (**Fig. 2a**). Moreover, *DKK1* was expressed more in the FAD lines  
138 relative to the CTRLs (**Extended Data Table 1**). *DKK1* is an antagonist of the  
139 canonical WNT signaling pathway<sup>64</sup>, which leads to the activation of the WNT/JNK pathway,  
140 which ultimately results in increased phosphorylation of c-JUN (encoded by *JUN*)<sup>65</sup>.  
141 Furthermore, the expression of the *JUN* gene itself was significantly upregulated in the FAD  
142 lines (log<sub>2</sub>(FC) = -0.6611642; p-value = 0.00039024; **Fig. 2a**). Consistent with this, the  
143 activation of the WNT/JNK pathway was suggested to play a role in A $\beta$  oligomer  
144 neurotoxicity<sup>51,66</sup>.

145 We employed the WEB-based GENE SeT Analysis Toolkit (WebGestalt)<sup>67</sup> to identify  
146 pathways associated with the 1,976 differentially expressed genes. This analysis revealed that  
147 these genes are associated with inflammation, neurogenesis, and neural differentiation, as  
148 well as cytoskeleton organization, apoptotic process, and the MAPK cascade (**Fig. 2b**).  
149 Notably, Ingenuity Pathway Analysis (Qiagen) identified c-JUN as one of the top enriched  
150 transcriptional regulators upstream to all of the differentially expressed genes, suggesting  
151 that most of the differentially expressed genes are c-JUN targets (**Fig. 2c**). Moreover, when  
152 analyzing the top enriched pathways that included the greatest number of differentially  
153 expressed genes, *JUN* was one of only 8 genes shared across all these pathways (Fig. 2d). To  
154 functionally test this computational prediction, we performed an immunoblot confirming  
155 upregulation of c-JUN and phosphorylated c-JUN in FAD hpNPCs (**Fig. 2e**)

156 Overall, these results indicate that the FAD progenitors are characterized by aberrant  
157 activation of the WNT/JNK pathway, an upregulation of *JUN* expression (which encodes for c-  
158 JUN), and dysregulation of its target genes.

159

### 160 **The WNT/JNK pathway is dysregulated in FAD CA3 hippocampal neurons**

161 Recent studies have demonstrated that canonical WNT signaling is inhibited by several  
162 pathogenic mechanisms in the brain of AD patients which leads to neural death and synaptic  
163 plasticity regulation impairment<sup>53,54</sup>. To investigate whether aberrant activation of the  
164 WNT/JNK pathway was also occurring in AD neurons, we differentiated CTRL and FAD

165 progenitors into CA3 hippocampal neurons using an established protocol (**Extended Data Fig.**  
166 **2a**)<sup>68</sup>. Both CTRL and FAD differentiated neurons expressed the specific CA3 markers, such as  
167 Glutamate Ionotropic Receptor Kainate Type Subunit 4 (GRIK4) and Secretagoin (SCGN;  
168 **Extended Data Fig. 2b**). However, the differentiation of the FAD lines resulted in a reduced  
169 number of mature CA3 neurons relative to the CTRL (51.4% in FAD; 87.2% in CTRL, **Extended**  
170 **Data Fig. 2b**).

171 We performed RNA-seq on the CA3 neurons and identified 1,105 differentially  
172 expressed genes between CTRL and FAD (FDR < 5%; **Extended Data Fig. 2c**). 82 of these genes,  
173 including *MAPK10 (JNK3)*, *ROR2*, *WNT7A* and *WNT7B*, are involved in both the WNT/JNK  
174 pathway and the MAPK cascade. Notably, using WebGestalt we identified the MAPK cascade  
175 as one of the top 10 differentially expressed pathways using WebGestalt (**Extended Data Fig**  
176 **2d**).

177 Finally, when analyzing the top enriched pathways that included the greatest number  
178 of differentially expressed genes, we found that only *MAPT* is shared across these pathways  
179 (**Extended Data Fig. 2e**). *MAPT* encodes for TAU, one of the key proteins in AD  
180 pathogenesis<sup>69,70</sup>, and recent studies have reported a correlation between aberrant c-JUN  
181 activity and the formation and maturation of NFTs<sup>32</sup>.

182 In summary, we observed that the WNT/JNK pathway is dysregulated, not only in FAD  
183 hippocampal progenitors but also in the CA3 hippocampal neurons CA3 neurons, suggesting  
184 a critical role for c-JUN in both these cell types.

185

### 186 **Dysregulated chromatin accessibility in FAD hippocampal progenitors**

187 To investigate if the transcriptomic aberrations identified in the FAD lines are  
188 associated with significant differences in chromatin accessibility, we performed an ATAC-seq  
189 on the CTRL- and FAD-derived progenitors, generating 150 bp long Paired-End reads.

190 We identified 3,100 differentially accessible (DA) regions between CTRL and FAD  
191 hpNPCs (FDR < 5%;  $\log_2(\text{FC}) \pm 1.5$ ). Of these regions, 68.35% were accessible in FAD compared  
192 to CTRL (**Fig. 3a**: FAD Up). By examining the closest gene to each of the 3,100 DA regions, we  
193 found that approximately 14% (430) of these DA regions were located nearest to a  
194 differentially expressed gene (i.e. their nearest gene was differentially expressed; **Fig. 3b**),  
195 suggesting that there are at least 430 enhancer-gene pairs (or promoter-gene pairs)  
196 dysregulated in the FAD progenitors. Of the 430 DA regions, 94.1% were putative enhancers

197 (distance from closest transcription start site or TSS > 1kb; **Fig. 3c**) whereas 5.9% were  
198 putative promoters (TSS distance < 1kb).

199 We then performed DNA-based motif analysis (MEME-ChIP) to identify any potential  
200 transcription factors underlying the changes in chromatin accessibility in the 3,100 DA  
201 regions. Remarkably, the most significantly enriched binding motif was the sequence  
202 recognized by JUN (e-value= $10^{-51}$ ; **Fig. 3d**).

203

### 204 **Transposable elements are aberrantly active in FAD hippocampal progenitors**

205 Aberrant de-repression of transposable elements is a hallmark of AD<sup>42,46</sup>. In  
206 agreement, we observed that 1,336 DA regions overlapped with a TE. The top 50 TE copies  
207 identified as significantly more accessible (i.e. active) in FAD relative to CTRL progenitors were  
208 predominantly (82%) retrotransposons (RTEs). Of these re-activated RTEs, 53.6% were LTRs,  
209 while the remaining were more or less equally distributed between LINEs (long interspersed  
210 nuclear elements) and SINEs (short interspersed nuclear elements; **Fig. 3e**). This aberrant LTR  
211 mobilization in the DA regions of the FAD lines was also investigated at the TE family level  
212 (**Fig. 3f**). In detail, 93.4% of the differentially accessible LTRs were endogenous retroviruses  
213 (ERVs; **Fig. 3h**). In line with these findings thus far, a motif analysis conducted on just the  
214 differentially accessible LTRs also revealed enrichment for the binding motif of JUN (e-value  
215 = $10^{-61}$ , **Fig. 3h**).

216 Together, these data indicate that the FAD progenitors are characterized by  
217 dysregulated chromatin accessibility at thousands of genomic sites, including hundreds of  
218 transposable elements. Moreover, our data suggests that most of these genomic regions are  
219 c-JUN target sites, and that aberrant c-JUN activity may underlie this observed chromatin  
220 dysregulation.

221 Several recent studies have demonstrated that AP-1 can act as a pioneer transcription  
222 factor by recruiting the BAF chromatin remodeling complex at condensed genomic regions to  
223 elicit chromatin accessibility<sup>35,71-73</sup>. Thus, we suggest that aberrantly active AP-1 in FAD  
224 progenitors may recruit BAF to its target sites (i.e. at the regions harboring the AP-1 motif),  
225 activating the TEs within these genomic regions.

226

227

### 228 **Aberrant TE mobilization elicits cGAS-STING activation**

229           Several studies have demonstrated that aberrant TE de-repression and mobilization is  
230 observed across a variety of neurodegenerative disorders, including AD<sup>39–41,43–46</sup>. A recent  
231 study in blind mole rats (an ageing model for longevity studies) has shown that TE de-  
232 repression leads to the cytosolic accumulation of TE-derived RNA-DNA hybrids, which  
233 activates the cGAS-STING innate immune pathway leading to cell death<sup>74</sup>. The blind mole rats  
234 leverage this mechanism to suppress pre-cancerous cells<sup>74</sup>. We thus set out to investigate if  
235 the aberrant TE de-repression observed in the AD brains may also lead to cytosolic RNA-DNA  
236 hybrid accumulation, innate immune response and apoptosis, all of which are hallmarks of the  
237 disease.

238           Intriguingly, immunostaining conducted on FAD and CTRL progenitors with the S9.6  
239 antibody, specific for the detection of RNA-DNA hybrids<sup>74</sup>, displayed significant hybrid  
240 accumulation in the cytoplasm of both FAD lines relative to the CTRLs (**Fig. 4a, b**). The RNA-  
241 DNA hybrid accumulation could be facilitated by the reduced expression levels of Ribonuclease  
242 H (RNase H) observed in the FAD progenitors. Namely, RNase H is specialized to selectively  
243 degrade RNA-DNA hybrids present in cells (**Fig.4c**)<sup>75</sup>. Additionally, we detected a robust  
244 increase in STING immunofluorescence signal quantified in the FAD progenitors (**Fig. 4a, b**).  
245 The upregulation of STING and cGAS in the FAD progenitors was further validated by western  
246 blot (**Fig. 4d**). Because activation of the cGAS-STING pathway in cells leads to their death via  
247 apoptosis<sup>76</sup>, we assessed whether FAD progenitors were executing this cell death program.  
248 Using western blot analysis, we observed an increase in cleaved caspase 3 (CC3) in the FAD  
249 lines compared to controls (**Fig. 4d**).

250           These experiments provide a solid mechanistic link between aberrant TE mobilization,  
251 cytoplasmic accumulation of RNA-DNA hybrids, and cGAS-STING activation potentially  
252 resulting in cell death characterized by caspase-3 activation in AD progenitors.

253

#### 254           **c-JUN inhibition rescues the neurogenic defects observed in the FAD hippocampal** 255 **progenitors**

256           Our genomic data revealed a distinct role for c-JUN. In fact, many of the differentially  
257 expressed genes are known c-JUN-regulated genes, and many of the DA regions harbor the  
258 JUN binding motif. Our data also shows that *JUN* is upregulated in the FAD progenitors and  
259 the activation of the WNT/JNK pathway may trigger phosphorylation of the upregulated c-  
260 JUN, leading to increased aberrant c-JUN activation. We hypothesize that these processes



261 may lead to aberrant AP-1 activity, resulting in the opening of thousands of genomic regions  
262 harboring the JUN binding motif, allowing for the de-repression of hundreds of TEs that are  
263 typically repressed in neural precursors.

264 To functionally validate our genomic data and test this hypothesis, we treated CTRL  
265 and FAD hpNPCs with a synthetic peptide competitor for the binding of JNKs, called c-JUN  
266 peptide (see methods). Treatment with this peptide for five days disrupts the interaction  
267 between JNK and c-JUN, ultimately inhibiting c-JUN phosphorylation and therefore pathway  
268 activation (**Fig. 5a**). Notably, treatment of the progenitors with the c-JUN inhibitor rescues the  
269 neurogenic defects previously observed (**Fig. 1**) in the FAD progenitors. Namely, in the c-JUN  
270 inhibitor-treated FAD progenitors (hereafter FAD+c-JUN peptide), the expression of TBR2 and  
271 FOXP1 becomes comparable to the CTRLs (**Fig. 5b**), suggesting a rescue of the intermediate  
272 progenitor pool.

273 Next, we performed RNA-seq on FAD+cJUN peptide and untreated FAD progenitors,  
274 using both FAD lines. This experiment led to the identification of 1,034 differentially  
275 expressed genes (FDR <5%,  $\log_2(\text{FC}) = \pm 1.5$ ; **Fig. 5c**). Notably, nearly a third of these genes  
276 (292/1034) were previously identified as differentially expressed when comparing CTRL and  
277 FAD progenitors (**Fig. 5d**), suggesting that inhibiting c-JUN phosphorylation rescues a  
278 significant fraction of the transcriptomic aberrations observed in the FAD hippocampal neural  
279 precursors.

280 WebGestalt analysis on these 292 genes revealed enrichment for neuronal  
281 differentiation processes and inflammation (**Fig. 5e**). For 83 of the 292 genes, including the  
282 early progenitor marker *PAX6*, the expression is entirely rescued by c-JUN inhibition  
283 (**Extended data table 2**). The 83 genes with complete rescue are enriched for pathways  
284 associated with neuron differentiation (p-value = 0.00021), neuron development (p-value =  
285 0.000324), and neuron generation (p-value = 0.000625).

286 These results demonstrate that c-JUN plays a crucial role in regulating neurogenesis  
287 and neuron differentiation in FAD hippocampal progenitors, and that aberrant c-JUN activity  
288 underlies a significant fraction of the transcriptomic abnormalities observed in FAD  
289 progenitors.

290

291 **c-JUN inhibition rescues TE de-repression, RNA-DNA hybrid formation, cGAS-STING**  
292 **activation, and caspase-3 activation**

293 c-JUN inhibition also impacts the observed aberrant opening of chromatin at TE loci.  
294 By performing an RT-qPCR on a group of RTEs, selected among those previously identified as  
295 aberrantly active in FAD, we demonstrated that c-JUN inhibition results in a significant  
296 reduction of TE transcription at both LTR and LINE loci (**Fig. 6a**).

297 Next, we tested if the reduction of aberrant TE mobilization, resulting from c-JUN  
298 inhibition (**Extended Data Fig. 3a**) affected RNA-DNA dimer accumulation and consequent  
299 cGAS-STING activation. Notably, FAD+cJUN peptide progenitors show a significant reduction  
300 of both RNA-DNA hybrid accumulation and cGAS-STING cascade activation relative to  
301 untreated cells (**Fig. 6b, c; Extended Data Fig. 3b**). Finally, an immunoblot for cleaved caspase  
302 3 indicated that inhibition of the JNK/c-JUN interaction also prevented activation of CC3 in  
303 FAD progenitors (**Fig. 6c**).

304 With these results, we demonstrate that by inhibiting c-JUN phosphorylation, the  
305 chromatin remains in a repressed state. Therefore, aberrant TE mobilization does not occur,  
306 preventing the activation of the cGAS–STING-induced caspase-3 activation.

307  
308 **Aberrant c-JUN activity underlies cGAS-STING activation and caspase-3 activation in**  
309 **sporadic AD hippocampal progenitors**

310 To test whether the mechanism that we characterized in FAD progenitors is shared  
311 between the two AD types (familial and sporadic) we differentiated two sporadic Alzheimer's  
312 iPSC lines (SAD1 and SAD2) into hpNPCs, following the same protocol previously described  
313 (**Extended Data Fig. 4a**). Notably, an RT-qPCR for the same markers characterized for FAD  
314 (NESTIN, TBR2, FOXG1, PROX1, and DCX) also revealed impaired neurogenesis in SAD, with an  
315 accelerated differentiation signature consistent with previous studies in sporadic AD  
316 (**Extended Data Fig 4b**)<sup>77</sup>. Interestingly, RNA-seq revealed that *JUN* is also upregulated in the  
317 SAD progenitors (**Extended Data Fig 4c**) and that the 183 differentially expressed genes in  
318 SAD hpNPCs are involved in neurogenesis and neuronal differentiation pathways (Extended  
319 Data Fig 5d). Moreover, as in FAD progenitors, SAD hpNPCs show abnormal chromatin  
320 accessibility at TE loci (**Extended Data Fig 4e**).

321 Treatment of SAD progenitors with the inhibitor of c-JUN phosphorylation led to a  
322 decrease in cytoplasmic RNA-DNA dimers (**Fig. 7a**), as well as a significant a reduction of  
323 cGAS/STING and cleaved caspase 3 activation (**Fig. 7b**). Importantly, these experiments

324 revealed that both AD types (familial and sporadic) share the same aberrantly activated cell-  
325 death axis.

326

327 **RTE-derived RNA-DNA hybrids inducing the cGAS-STING cell-death axis are present in**  
328 **familial and sporadic AD cerebral organoids**

329 Finally, we tested whether this pathway was also active in cerebral organoids, which harbor  
330 both progenitor cells and differentiated neurons in a three-dimensional architecture,  
331 resembling the human brain. The FAD, SAD, and CTRL iPSC lines were differentiated into  
332 cerebral organoids through an embryoid body intermediate. After 62 days,  
333 immunofluorescence was performed on cerebral organoids exhibiting the proper neuronal  
334 differentiation (**Extended Data Fig. 5a**). We observed a more significant overall accumulation  
335 of RNA-DNA hybrids and an upregulation of STING in FAD and SAD organoids compared to  
336 CTRL organoids (**Fig. 7c, Extended Data Fig. 5b**). The activation of the cGAS-STING cell-death  
337 axis and the increase in CC3 were also confirmed through western blot (**Fig. 7d**). As expected,  
338 the cytoplasmic accumulation of RNA-DNA hybrids was seen in TBR2-positive neural  
339 progenitors (**Extended Data Fig 5c**) that are enriched in the FAD organoids (**Extended Data**  
340 **Fig 5c**). Interestingly, mature neurons (MAP2-positive) in AD cerebral organoids also have a  
341 cytoplasmic accumulation of RNA-DNA hybrids and an upregulation of STING (**Extended**  
342 **Data Fig 5d**). Finally, activating the cGAS-STING cell-death axis in neurons leads to caspase-3  
343 activation (**Extended Data Fig 5e**). These organoid-based data further validated our proposed  
344 pathogenic mechanism and cascade for both familial and sporadic AD. This suggests that the  
345 molecular impairment driven by TE re-activation observed in progenitors, is also maintained  
346 in mature neurons in a physiological model of neural differentiation.

347 Overall, this collection of experiments unveils a novel mechanism linking AP-1 to TE  
348 mobilization, innate immunity and cell death in AD.

349

350 **Discussion**

351 Alzheimer's disease (AD) is the most common neurodegenerative disorder. Fibrillar  
352 deposits of highly phosphorylated TAU protein are a key pathological feature of AD as well as  
353 other AD related dementias<sup>78</sup>. Importantly, studies in *Drosophila* have highlighted that TAU  
354 hyperphosphorylation and upregulation correlate with global nuclear chromatin relaxation

355 and abnormal transcriptional activation of heterochromatic genomic regions<sup>40,43</sup>. One of the  
356 consequences of this phenomenon is the aberrant mobilization of TEs, which are typically  
357 repressed in the genome. Progressive TE de-repression and mobilization in the brain typically  
358 correlates with ageing<sup>39,44</sup>. However this phenomenon is significantly exacerbated in many  
359 neurodegenerative disorders, including Amyotrophic Lateral Sclerosis (ALS), Multiple  
360 Sclerosis, and Alzheimer's<sup>39,41-46</sup>.

361         Recent studies showed that overexpression of TAU alone, in aging *Drosophila* brains  
362 is sufficient to increase the expression of retrotransposons, mostly belonging to the LINE and  
363 ERV groups<sup>40,43</sup>. However, the mechanism linking tauopathies to chromatin relaxation and TE  
364 mobilization remains unexplored.

365         Here, we unveiled a cascade of biological processes which links the upregulation of  
366 the AP-1 member, c-JUN, to aberrant TE mobilization. We detected an upregulation of c-JUN  
367 in hippocampal progenitors derived from both familial and sporadic AD iPSC lines. Further,  
368 kinases involved in the regulation and phosphorylation of c-JUN (MAPK/JNK signaling) were  
369 also dysregulated in fully differentiated FAD iPSC-derived CA3 hippocampal neurons. We  
370 demonstrated that c-JUN upregulation has two main consequences: 1) the dysregulation of  
371 hundreds of genes involved in neuronal differentiation and neuron generation 2) the  
372 activation of hundreds of RTEs, that harbor the AP-1 binding motif. AP-1 activating repressed  
373 chromatin was not an unexpected result; several recent studies have demonstrated that AP-  
374 1 can act as a pioneer transcription factor by recruiting the BAF chromatin remodeling  
375 complex to its targets to elicit accessibility and activation<sup>35,36,79</sup>.

376         The second goal of our study was to investigate the consequences of aberrant TE de-  
377 repression and mobilization. With our experiments, we demonstrated that abnormal  
378 expression of RTEs leads to the accumulation of RTE-derived RNA-DNA hybrids in the  
379 cytoplasm of the AD hpNPCs, as well as in AD cerebral organoids. We showed that this triggers  
380 the activation of the innate immune response, particularly of the cGAS-STING pathway, which  
381 ultimately elicits the accumulation of cleaved caspase-3, a molecular signature of cells  
382 undergoing apoptosis<sup>80</sup>. Importantly, we observed this phenomenon in both familial and  
383 sporadic AD lines. We were able to explicitly demonstrate that c-JUN facilitates this  
384 mechanism and that treating the AD hpNPCs with a c-JUN inhibitor sufficiently decreases this  
385 cascade leading to a reduction of cell death.

386 Neuroinflammation plays an important role in the pathogenesis of Alzheimer's  
387 disease, and in this context, the cGAS–STING signalling pathway has recently emerged as a  
388 key mediator of inflammation in the settings of infection, cellular stress and tissue damage.<sup>81</sup>  
389 In fact, neuroinflammation is primarily driven by type-I interferons (INFs), and the role of  
390 STING in the control of the type-I IFN-mediated mediated response is becoming increasingly  
391 appreciated.<sup>82</sup> Given this premise, the finding of our studies may open new potential  
392 therapeutic avenues. For instance, nanobody-based targeting<sup>83</sup> of cytoplasmatic RNA-DNA  
393 hybrids might provide a new therapeutic approach to counteract the activation of innate  
394 immune response and to reduce neuroinflammation, bypassing the side effects of the anti-  
395 inflammatory drugs currently involved in the clinical trials. Additionally, experiments on pre-  
396 clinical models may be employed to test compounds which could act downstream in the cell  
397 death axis demonstrated here. Finally, the cytoplasmic accumulation of RNA-DNA hybrids  
398 could be used as an early biomarker for AD in imaging tools for diagnosis.

399 In summary, these lines of evidence point toward a pathological mechanism  
400 underlying AD. Future studies on possible therapeutic intervention that would target this  
401 mechanism are essential with the goal of identifying therapeutic strategies and early  
402 diagnosis for AD and other neurogenerative disorders.

403

#### 404 **Acknowledgements**

405 The authors are thankful to Julius Judd and Cedric Feschotte (Cornell) for sharing the primers  
406 for RT-PCR at TE loci, and for insightful discussion of the findings. The authors thank the  
407 Jefferson Stem Cell Center for preliminary expansion and characterization of the patient lines,  
408 and for helping with the optimization of the differentiation protocols. This study was funded  
409 by NIH R35 GM138344-01, awarded to M.T. The following sources also supported this work:  
410 National Institutes of Health R21-NS090912 (D.T.), RF1-AG057882 (D.T.), Muscular Dystrophy  
411 Association grant 628389 (D.T.); DoD grant W81XWH-21-1-0134 (M.E.C.); and Farber Family  
412 Foundation (D.T., C.S.).

413

#### 414 **Data availability**

415 The original genome-wide data generated in this study have been deposited in the GEO  
416 database under accession code GSE213610.

417

418 **Author contributions**

419 M.T., D.T and C.S. designed the experiments. C.S. performed most of the experiments. S.M.B,  
420 performed some of the experiments. M.E.C and M.S. contributed to some experiments and  
421 analyses. C.S., M.T., S.M.B. and D.T. analyzed the data. C.S. wrote the manuscript with the  
422 contribution of all the authors.

423 **Competing interests**

424 The authors declare no competing interests.

425  
426  
427  
428  
429  
430  
431  
432  
433  
434  
435  
436  
437  
438  
439  
440  
441  
442  
443  
444  
445  
446  
447  
448  
449  
450  
451  
452  
453  
454  
455  
456  
457  
458  
459  
460

461 **Figures**

462

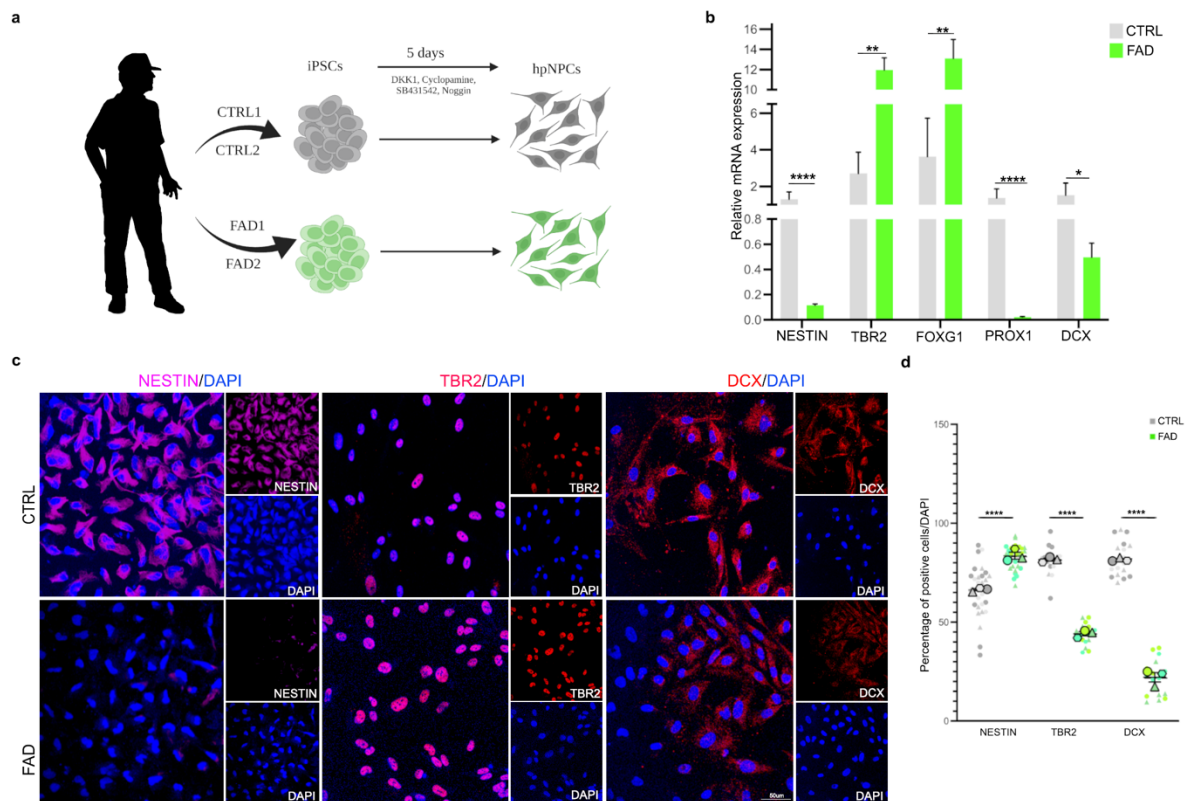

463

464 **Figure 1. FAD iPSC-derived hippocampal neural progenitors display impaired neurogenesis.**

465 **a.** Scheme of the protocol for hippocampal neural progenitor cell (hpNPC) differentiation  
466 (made with BioRender.com). iPSCs were derived from the skin fibroblasts of two patients with  
467 familial Alzheimer’s disease (FAD1 and FAD2) and two healthy controls (CTRL1 and CTRL2),  
468 and differentiated into hpNPCs after 5 days in induction media. The hpNPCs were maintained  
469 in proliferation media post-induction. **b, c, & d.** qPCR and immunofluorescence for markers  
470 of different stages of hpNPC populations. The qPCR shows a neurogenic defect in FAD  
471 progenitors, with enrichment for TBR2-positive intermediate progenitors as also confirmed  
472 in the immunofluorescence and relative quantification for hpNPC population markers. NESTIN  
473 – early precursors; TBR2/FOXG1 – intermediate progenitors; PROX1 – late progenitors; DCX –  
474 neuroblasts. Scale bar 50um, 40X magnification. DAPI staining on nuclei in blue.

475

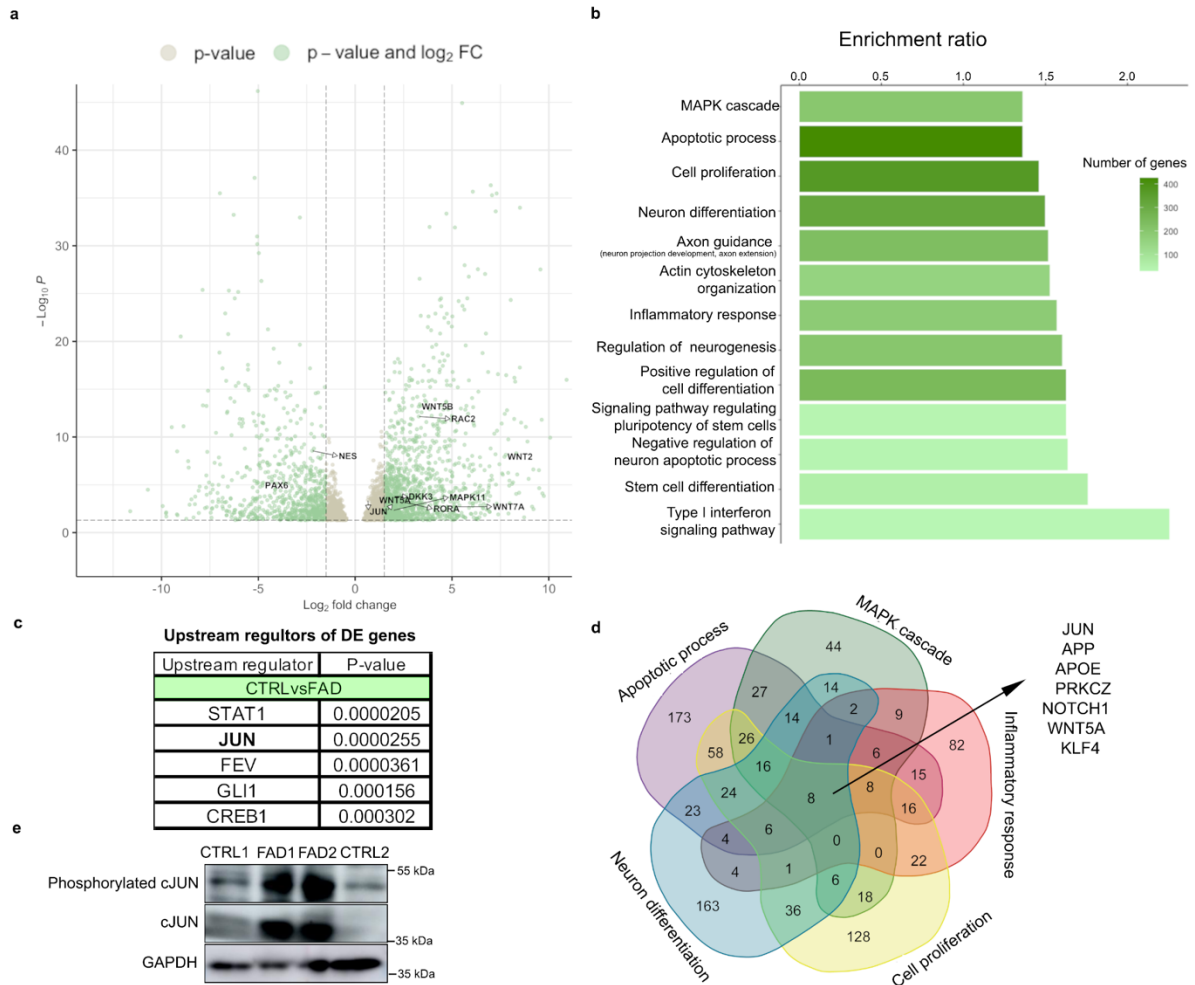

476

477 **Figure 2. JUN upregulation causes dysregulated transcriptional networks in FAD hpNPCs.**

478 **a.** Volcano plot showing genes differentially expressed in FAD hpNPCs relative to CTRL  
 479 hpNPCs. Labeled differentially expressed genes are involved in neurogenesis (*PAX6*, *NES*) and  
 480 WNT/JNK signaling (*WNT2*, *WNT7A*, *WNT5B*, *RAC2*, *RORA*, *MAPK11*, *DKK3*, *WNT5A*). Green =  
 481 differentially expressed genes passing significance thresholds  $p\text{-value} < 0.05$  and  $\log_2(\text{fold-}$   
 482  $\text{change}) \pm 1.5$ ; Gray = differentially expressed genes passing significance threshold of  $p\text{-}$   
 483  $\text{value} < 0.05$ . **b.** Enriched pathways associated with the 1,976 differentially expressed genes  
 484 in FAD hpNPCs predicted by WebGestalt. **c.** Top upstream regulators/transcription factors of  
 485 the 1,976 differentially expressed genes in FAD hpNPCs, as predicted by Ingenuity Pathway  
 486 Analysis (Qiagen). **d.** Venn diagram showing the genes shared across all of the top five  
 487 enriched pathways with the most differentially expressed genes (venn diagram made with  
 488 <https://bioinformatics.psb.ugent.be>). **e.** Immunoblot displaying the upregulation of both *c-*  
 489 *JUN* and phosphorylated *c-JUN* across FAD and CTRL hpNPCs.

490



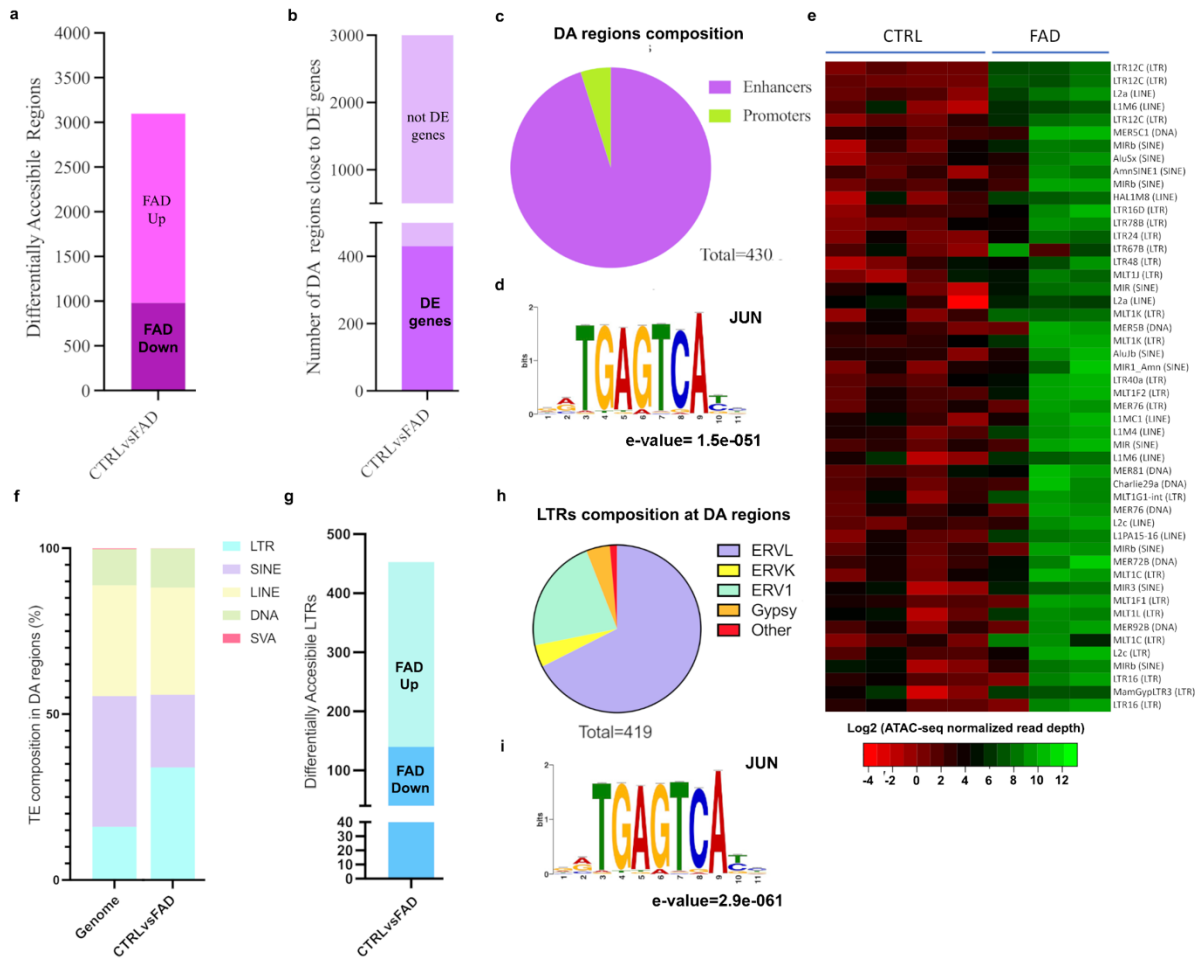

491

492 **Figure 3. Differentially accessible transposable elements in FAD hpNPCs.** a. Differentially  
 493 accessible (DA) regions in the FAD hpNPCs compared to CTRL hpNPCs. FAD Up = significantly  
 494 more accessible in FAD relative to CTRLs; FAD Down = significantly less accessible in FAD  
 495 relative to CTRLs. b. DA regions located near a differentially expressed gene. c. DA regions  
 496 near differentially expressed genes are predominantly enhancers (>1 kb from the  
 497 transcription start site or TSS). d. MEME-ChIP analysis of 3,100 DA regions uncovered an  
 498 enriched binding motif for JUN. e. Heatmap showing the top 50 TE copies identified as  
 499 significantly more accessible in FAD relative to CTRL hpNPCs. f, g, h. Family distribution of the  
 500 aberrantly active TEs in FAD progenitors. i. The aberrantly active LTRs are enriched for the  
 501 JUN motif.

502

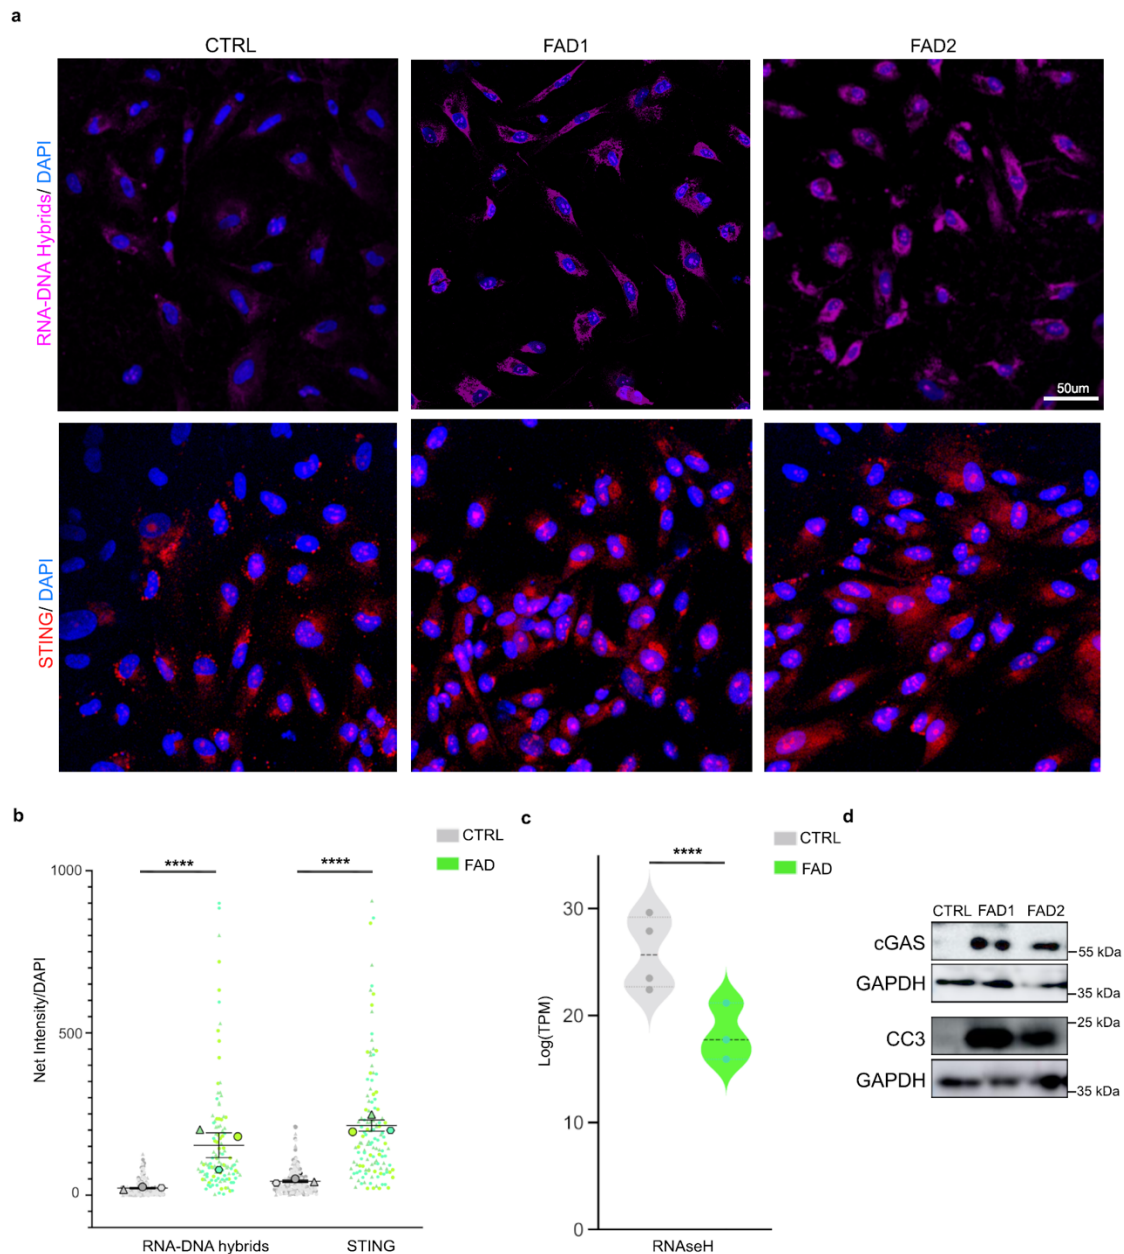

503

504 **Figure 4. Accumulation of RNA-DNA hybrids triggers the cGAS-STING cascade and CC3**

505 **activation in FAD hpNPCs. a.** Immunofluorescence for RNA-DNA hybrids (S9.6 antibody, pink

506 signal) and STING (red signal) displays the accumulation of RNA-DNA hybrids in the cytoplasm

507 of FAD hpNPCs, and an upregulation of STING. Scale bar 50um, 40X magnification. DAPI

508 staining on nuclei in blue. **c.** Violin plot of log<sub>2</sub>(TPM) for RNaseH in CTRL and FAD hpNPCs.

509 **d.** Immunoblots for cGAS, STING, and cleaved caspase 3 (CC3) in FAD hpNPCs relative to

510 CTRLs.

511

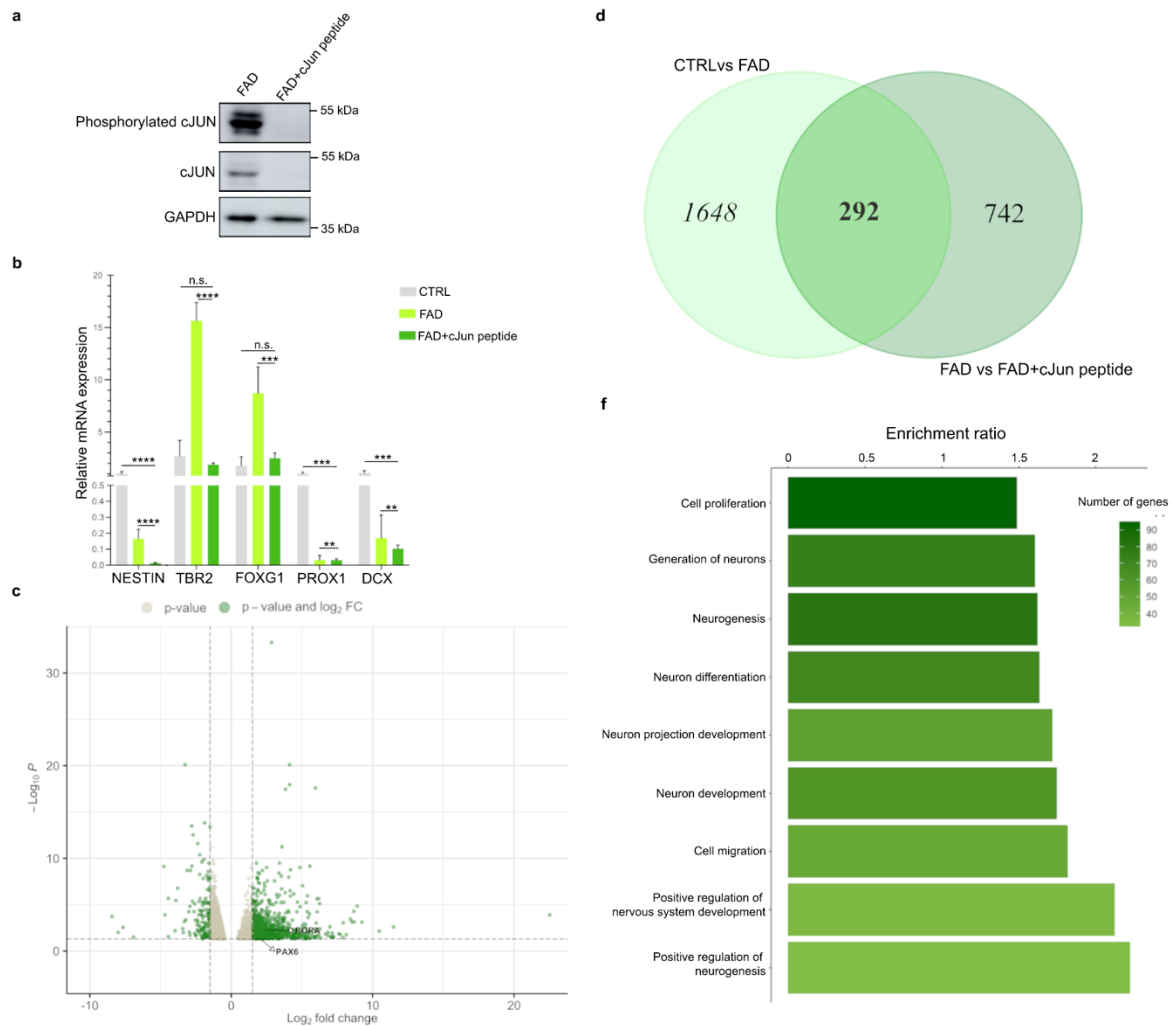

512

513 **Figure 5. Inhibiting c-JUN phosphorylation partially rescues the impaired neurogenesis and**

514 **the gene expression differences in FAD hpNPCs. a.** Immunoblot of c-JUN and phosphorylated

515 c-JUN untreated and treated with c-JUN peptide (FAD+c-JUN peptide) in FAD hpNPCs. **b.** qPCR

516 analysis for hpNPCs markers in CTRL hpNPCs, untreated FAD hpNPCs, and c-JUN peptide-

517 treated FAD hpNPCs **c.** Volcano plot of differentially expressed genes in FAD+c-JUN peptide

518 relative to untreated FAD. Labeled genes are involved in neurogenesis (*PAX6*) and WNT/JNK

519 signaling (*RORA*). Green = differentially expressed genes passing significance thresholds p-

520 value < 0.05 and log<sub>2</sub>(fold-change) ± 1.5; Gray = differentially expressed genes passing

521 significance threshold of p-value < 0.05. **d.** Venn diagram displaying the genes that were

522 differentially expressed both in the “FAD+c-JUN peptide vs untreated FAD” comparison and

523 in the “FAD vs CTRL” comparison. 292 differentially expressed genes overlap in the two

524 comparisons. (venn diagram was made with <https://bioinformatics.psb.ugent.be>) **e.**

525 Pathways enriched in the 292 overlapping genes predicted by WebGestalt.

526

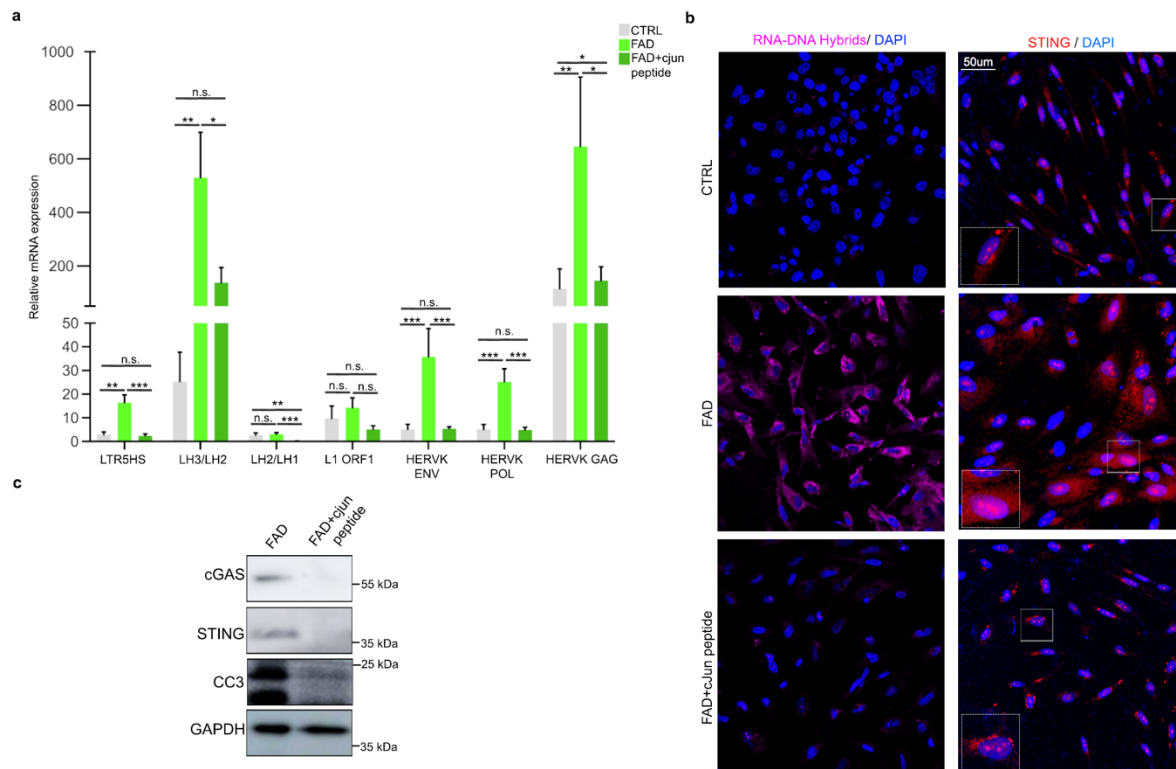

527

528 **Figure 6. Inhibiting c-JUN phosphorylation rescues aberrant TE derepression and the**

529 **activation of the cGAS-STING cascade in FAD progenitors. a.** qPCR analysis for a group of TEs

530 selected among those previously identified as aberrantly active in FAD hpNPC. Primers for

531 HERVK/LTR5HS target individual ORFs from the LTR; Primers for L1-ORF1 target a conserved

532 region in ORF1 of 6x; the other L1 primers target the L1PA2 family; the LH2/LH3 primers target

533 the end of the 3' UTR; The LH1/LH2 primers target the 5' of the other amplicon. **b.**

534 Immunofluorescence for RNA-DNA hybrids (S9.6 antibody, pink signal) and STING (red signal)

535 shows that c-JUN inhibition significantly decreases the accumulation of RNA-DNA hybrids and

536 STING levels in the cytoplasm of FAD hpNPCs. Scale bar 50um, 40X magnification. White dot

537 line boxes represent 2X magnification of the corresponding squared box. DAPI staining on

538 nuclei in blue. **c.** Immunoblots for cGAS, STING, and cleaved caspase 3 (CC3) on FAD+c-JUN

539 peptide hpNPCs relative to FAD progenitors.

540

541

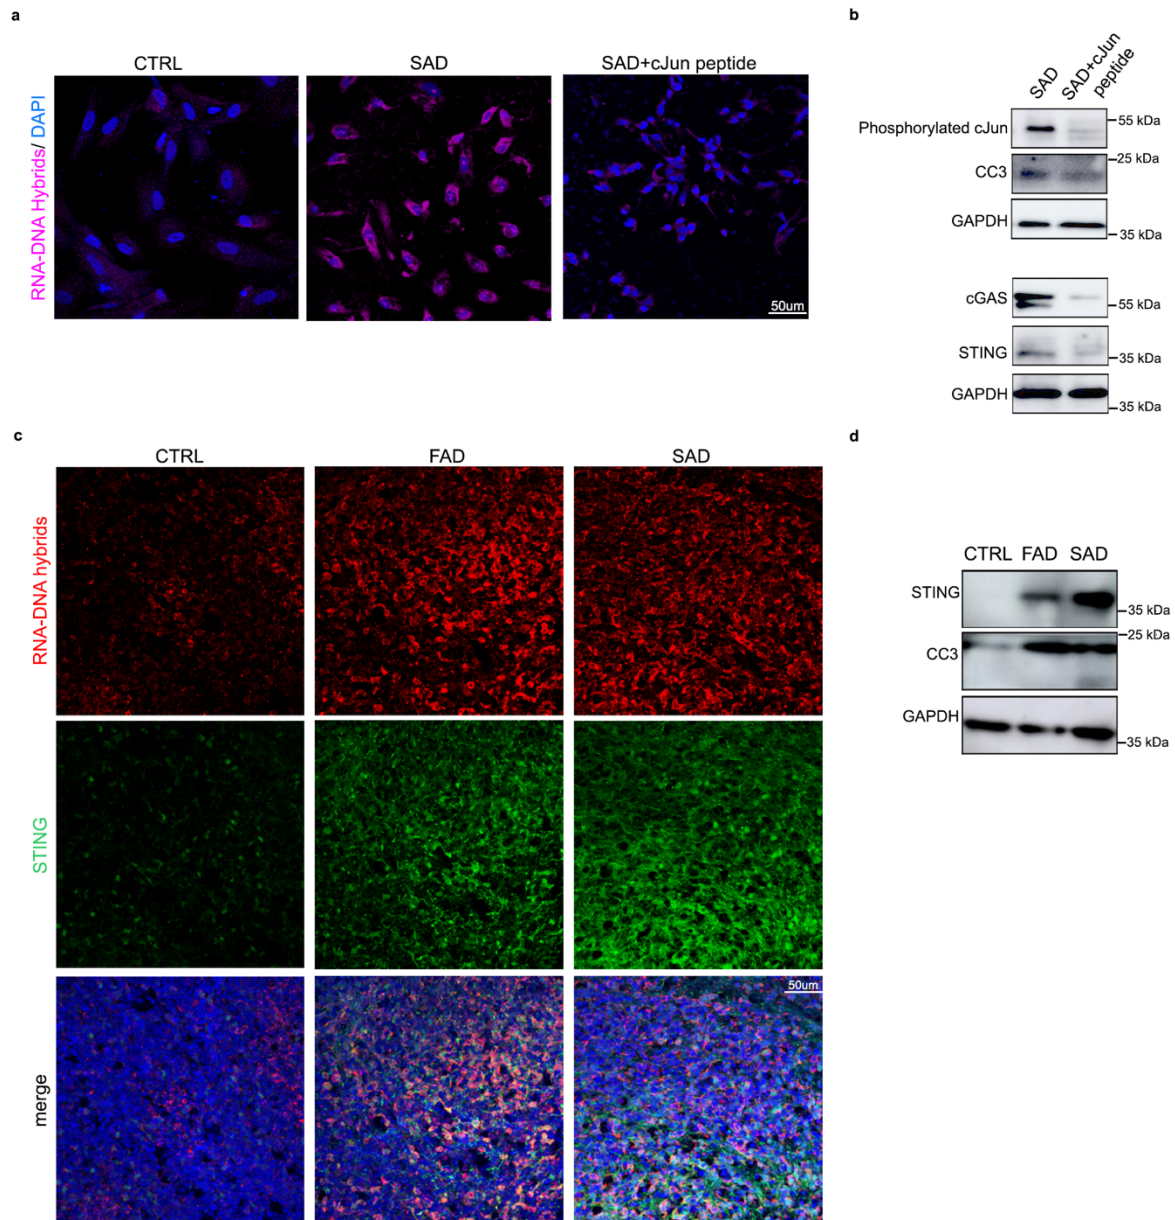

542

543 **Figure 7. TE-derived RNA-DNA hybrids and cGAS-STING activated in SAD progenitors and AD**  
544 **cerebral organoids** **a.** Immunofluorescence for RNA-DNA hybrids (S9.6 antibody, pink signal)  
545 and STING (red signal) show that c-JUN inhibition significantly decreases the accumulation of  
546 RNA-DNA hybrids and STING levels in the cytoplasm of SAD hpNPCs. Scale bar 50µm, 40X  
547 magnification. DAPI staining on nuclei in blue. **b.** Immunoblots for phosphorylated c-JUN,  
548 cGAS, STING, and cleaved caspase 3 (CC3) on SAD+c-JUN peptide hpNPCs relative to SAD  
549 progenitors. **c.** Immunofluorescence for RNA-DNA hybrids (S9.6 antibody, red signal) and  
550 STING (green signal) on cerebral organoids (CTRL, FAD, SAD). Scale bar 50µm, 40X

551 magnification. DAPI staining on nuclei in blue. **d.** Immunoblots for STING and cleaved caspase  
552 3 (CC3) on AD organoids relative to CTRLs.

553

## 554 **Materials and Methods**

555

### 556 **Human iPSC culture**

557 Control and Alzheimer's disease iPSC lines were obtained from the Coriell Institute for Medical  
558 Research (Camden, NJ). In particular, we received two control lines (Control line-  
559 1:IPSM8Sev3, male, 65 years old and Control line-2: iPSM15Sev4, female, 62 years old) CTRL1  
560 and CTRL2 respectively; two familial Alzheimer's disease lines (Familial Alzheimer's line-1:  
561 AG25370, female, 80 years old and Familiar Alzheimer's line-2: GM24675, male, 60 years old)  
562 FAD1 and FAD2 respectively; and two sporadic Alzheimer's disease lines (Sporadic Alzheimer's  
563 line-1: AG27607, female, 69 years old and Sporadic Alzheimer's line-2: GM24666, male, 83  
564 years old) SAD1 and SAD2 respectively. All the AD lines excepted for AG25370 were validated  
565 in previous studies<sup>77,83,85,86</sup>.

566 The iPSC lines were expanded in feeder-free, serum-free mTeSR™1 medium (85850,  
567 STEMCELL Technologies). Cells were passaged ~1:10 at 80% confluency using EDTA 0.5mM  
568 (15575020, Invitrogen) and small cell clusters (50–200 cells) were subsequently plated on  
569 tissue culture dishes coated overnight with Geltrex™ LDEV-Free hESC-qualified Reduced  
570 Growth Factor Basement Membrane Matrix (A1413302, Fisher-Scientific).

571

### 572 **hpNPC Differentiation**

573 The iPSC lines were differentiated into hpNPCs as previously described<sup>47</sup>. Briefly, iPSCs were  
574 treated with hpNPC induction medium for five days: DMEM/F-12 medium (Invitrogen)  
575 supplemented with B-27 (A3582801, Gibco), N-2 (17502048, Gibco), DKK1 (778606,  
576 Biolegend), Cyclopamine (C-8700, LC Laboratories), Noggin (597004, Biolegend), and  
577 SB431542 (S1067, Selleck Chemicals LLC). At day 6, the hpNPCs were plated in a new geltrex-  
578 coated well and cultured in proliferation medium, consisting of DMEM/F-12 medium  
579 (Invitrogen) supplemented with B-27 (A3582801, Gibco), N-2 (17502048, Gibco) and 20 ng/ml  
580 bFGF (713304, Biolegend).

581

### 582 **CA3 Neuron Differentiation**

583 The iPSC lines were differentiated into CA3 Neurons as previously described<sup>68</sup>. Briefly, iPSCs  
584 were treated with hpNPC induction medium for 15 days. At day 16, the hpNPCs were plated  
585 in a new PLO-Laminin double-coated well in Neuron induction medium, consisting  
586 in DMEM/F12 medium (11320082, Gibco) supplemented with B-27 (A3582801, Gibco), N-2  
587 (17502048, Gibco), BDNF (450-02, Preprotech), Dibutyryl-cAMP (11-415-0, Tocris), laminin  
588 (23017015, Thermofisher Scientific), AA (A4544-25G, Sigma), WNT3a (5036-WN, R&D  
589 System). After 3 weeks, the neurons were switched to neuron medium, consisting  
590 of DMEM/F-12 medium (Invitrogen) supplemented with B-27 (A3582801, Gibco), N-2  
591 (17502048, Gibco), BDNF (450-02, Preprotech), Dibutyryl-cAMP (11-415-0, Tocris), laminin  
592 (23017015, Thermofisher Scientific) and AA (A4544-25G, Sigma) for one week. Mature CA3  
593 neurons were then collected for RNA-seq and fixed for immunofluorescence.

594

### 595 **Cerebral organoid Differentiation**

596 CTRL and AD (FAD and SAD) iPSCs were differentiated into cerebral organoids following a  
597 previously published protocol<sup>86</sup>. Briefly, embryoid bodies were formed from CTRL, FAD, and  
598 SAD iPSCs and maintained in Essential 8 media (E8 media, A1517001, ThermoFisher Scientific)  
599 supplemented with ROCK inhibitor (SCM075, Millipore) for 4 days. Neuronal induction was  
600 obtained by replacing the E8 media with Neural induction media: DMEM/F12 (11330-032,  
601 Invitrogen) supplemented with N-2 (17502048, Gibco), 1% Glutamax (35050-038, Invitrogen),  
602 1% MEM-NEAA (M7145, Sigma), and Heparin at a final concentration of 1 µg/ml (H3149,  
603 Sigma). After 4-5 days, when neuroepithelium formation was achieved, spheroids were  
604 embedded in Matrigel (356234, BD Biosciences) and cultured in Cerebral organoid  
605 differentiation media: DMEM/F12 (11330-032, Invitrogen) and Neurobasal (21103049,  
606 Invitrogen) (1:1) supplemented with B27 without VitA (12587010, Invitrogen), N2 (17502048,  
607 Gibco), Insulin (I9278-5ML, Sigma), 2-Mercaptoethanol (1:100 dilution, 8057400005, Merk),  
608 1% MEM-NEAA (M7145, Sigma), and Glutamax (35050-038, Invitrogen). After 4 days in static  
609 culture, spheroids were transferred to a shaker and maintained. Half media changes were  
610 performed every 3-4 days.

611

### 612 **hpNPC c-JUN peptide treatment**

613 CTRL, FAD, and SAD hpNPCs were treated with 100µM of c-JUN peptide (19-891, Fisher  
614 Scientific) for 5 days in a proliferative condition. This peptide comprises residues 33–57 of the

615 JNK binding ( $\delta$ ) domain of human c-JUN and it is a competitive inhibitor of JNK/c-JUN  
616 interaction preventing c-JUN phosphorylation and activation.

617

### 618 **Processing of organoids**

619 At day 62, the whole organoids were fixed in 4% PFA overnight at 4 °C. After cryoprotection  
620 in 30% sucrose (s7903, Sigma), organoids were cryo-sectioned at 20  $\mu$ m thickness and slices  
621 were analyzed by immunohistochemistry.

622

### 623 **Immunofluorescence**

624 Immunohistochemistry of iPSCs, hpNPCs, and CA3 neurons was performed in  $\mu$ -Slide 4 Well  
625 Glass Bottom (80426, IBIDI), while organoid IF was performed on 20- $\mu$ m serial sections. Upon  
626 fixation (4% PFA for 10 minutes), cells were permeabilized in blocking solution (0.1% Triton X-  
627 100, 1X PBS, 5% normal donkey serum) and then incubated with the antibody of interest. The  
628 total number of cells in each field was determined by counterstaining cell nuclei with 4,6-  
629 diamidine-2-phenylindole dihydrochloride (DAPI; Sigma-Aldrich; 50 mg/ml in PBS for 15 min  
630 at RT). To improve the efficiency of Tbr2 detection, the cells and the organoid slides, prior to  
631 permeabilization and blocking step, were treated with 10 mM sodium citrate (pH = 6) for 10  
632 minutes at 95 °C.

633 For RNA-DNA hybrid staining (S9.6 antibody), upon fixation (4% PFA for 10 minutes),  
634 cells and organoid slides were permeabilized in PBS 1X 0.5% Triton X-100 for 15 minutes. They  
635 were then incubated overnight at -20°C in 100% methanol. The samples were then blocked  
636 in 1X PBS 5% NDS for 4 hours at 37°C and followed by overnight incubation with the S9.6  
637 antibody.

638 Immunostained cells and organoid slices were analyzed via confocal microscopy using  
639 a Nikon A1R+. Images were captured with x40 for hpNPCs and x20 and x60 objectives for  
640 organoids and a pinhole of 1.0 Airy unit. Analyses were performed in sequential scanning  
641 mode to rule out cross-bleeding between channels. Fluorescence intensity quantification was  
642 performed with Fiji and the NIS-Elements AR software. All antibodies are listed in the  
643 Antibodies table (Supplementary Table S3).

644

645



646 **Western Blot**

647 For total lysate, cells were harvested and washed three times in 1X PBS and lysed in RIPA  
648 buffer (50mM Tris-HCl pH7.5, 150mM NaCl, 1% Igepal, 0.5% sodium deoxycholate, 0.1% SDS,  
649 500uM DTT) with protease and phosphatase inhibitors. Twenty µg of whole cell lysate were  
650 loaded in Novex WedgeWell 4-12% Tris-Glycine Gel (Invitrogen) and separated through gel  
651 electrophoresis (SDS-PAGE) in Tris-Glycine-SDS running buffer (Invitrogen). The proteins were  
652 then transferred to ImmunBlot PVDF membranes (ThermoFisher) for antibody probing.  
653 Membranes were incubated with 10% BSA in 1X TBST for 1 hour at room temperature (RT),  
654 then incubated for variable times and concentrations with the suitable antibodies  
655 (Supplementary table S3) diluted in 5% BSA in 1X TBST. Membranes were then washed with  
656 1X TBST and incubated in the HRP-linked species-specific secondary antibody (1:10000  
657 dilution) for one hour at RT. The membrane was visualized using the Pierce ECL Plus Western  
658 Blotting Substrate (32132; ThermoFisher) and imaged with an Amersham Imager 680. All  
659 antibodies are listed in the Antibodies table (Supplementary Table S3).

660

661 **Real-time quantitative polymerase chain reaction (RT-qPCR)**

662 Cells were lysed in Tri-reagent (R2050-1-50, Zymo Research) and RNA was extracted using the  
663 Direct-zol RNA Miniprep kit (Zymo Research). 600ng of template RNA was retrotranscribed  
664 into cDNA using RevertAid first strand cDNA synthesis kit (Thermo Scientific) according to the  
665 manufacturer's directions. 15ng of cDNA was used for each real-time quantitative PCR  
666 reaction with 0.1 µM of each forward and reverse primer, 10 µL of PowerUp™ SYBR™ Green  
667 Master Mix (Applied Biosystems) in a final volume of 20 µl, using a QuantStudio 3 Real-Time  
668 PCR System (Applied Biosystems). Thermal cycling parameters were set as follows: 3 minutes  
669 at 95°C, followed by 40 cycles of 10 seconds at 95°C and 20 seconds at 63°C followed by  
670 30 seconds at 72°C. Each sample was run in triplicate. 18S rRNA was used for normalization.  
671 Primer sequences are reported in Supplementary Table S4.

672

673 **RNA-Seq**

674 Cells were lysed in Tri-reagent (R2050-1-50, Zymo Research) and total RNA was extracted  
675 using Quick-RNA Miniprep kit (R1055, Zymo Research) according to the manufacturer's  
676 instructions. RNA was quantified using a DeNovix DS-11 Spectrophotometer while the RNA  
677 integrity number (RIN) was checked on an Agilent 2200 TapeStation. Only samples with RIN

678 values above 8.0 were used for transcriptome analysis. RNA libraries were prepared using  
679 NEBNext® Poly(A) mRNA Magnetic Isolation Module (E7490S, New England Biolabs),  
680 NEBNext® UltraTM II Directional RNA Library Prep Kit for Illumina® (E7760S, New England  
681 Biolabs) and NEBNext® UltraTM II DNA Library Prep Kit for Illumina® (E7645S, New England  
682 Biolabs) according to the manufacturer's instructions. The libraries were sequenced using an  
683 Illumina NextSeq2000, generating 150 bp Paired-End reads.

684

### 685 **RNA-Seq Analyses**

686 Reads were aligned to hg19 using STAR v2.5<sup>87</sup> in 2-pass mode with the following parameters:  
687 --quantMode TranscriptomeSAM --outFilterMultimapNmax 10 --outFilterMismatchNmax 10  
688 --outFilterMismatchNoverLmax 0.3 --alignIntronMin 21 --alignIntronMax 0 --  
689 alignMatesGapMax 0 --alignSJoverhangMin 5 --runThreadN 12 --twopassMode Basic --  
690 twopass1readsN 60000000 --sjdbOverhang 100. We filtered bam files based on alignment  
691 quality (q = 10) using Samtools v0.1.19 (Li H, et al., 2009). We used the latest annotations  
692 obtained from Ensembl to build reference indexes for the STAR alignment. Kallisto (Bray et  
693 al., 2016) was used to count reads mapping to each gene. RSEM<sup>88</sup> was used to obtain FPKM  
694 (Fragments Per Kilobase of exon per Million fragments mapped). Differential gene expression  
695 levels were analyzed using DESeq2<sup>89</sup>, with the following model: design = ~condition, where  
696 condition indicates either CTRL or Alzheimer's disease (FAD or SAD) lines.

697

### 698 **ATAC-Seq**

699 For ATAC-Seq experiments, 50,000 cells per condition were processed as described in the  
700 original ATAC-seq protocol paper<sup>90</sup>. Briefly, 50,000 cells were collected, washed, and lysed.  
701 The chromatin was subjected to transposition/library preparation via a Tn5 transposase using  
702 the Tagment DNA Enzyme and Buffer Kit (20034197, Illumina) and incubated at 37°C for 30  
703 min with slight rotation (300 RPM). Transposed DNA was purified using a MinElute PCR  
704 Purification Kit (28004; Qiagen). Transposed DNA fragments were then amplified using a  
705 universal and barcoded primer<sup>90</sup>. Thermal cycling parameters were set as follows: 1 cycle of  
706 72°C for 5 minutes, 98°C for 30 seconds, followed by 5 cycles of 98°C for 10 seconds, 63°C for  
707 30 seconds, and 72°C for 1 min. The amplification was paused and 5ul of the partially  
708 amplified, transposed DNA was used for a qPCR side reaction including the universal and  
709 sample-specific barcoded primers<sup>90</sup>, PowerUp™ SYBR™ Green Master Mix (Applied

710 Biosystems), NEBNext High-Fidelity 2x PCR Master Mix, and nuclease-free water. The qPCR  
711 side reaction parameters were set as follows: 1 cycle of 72°C for 5 minutes, 98°C for 30  
712 seconds, followed by 40 cycles of 98°C for 10 seconds, 63°C for 30 seconds, and 72°C for 1  
713 min. The Rn vs cycle plot was used to determine the remaining number of PCR cycles needed  
714 where 1/3 of the maximum fluorescent intensity corresponds to the cycle number. The  
715 remaining partially amplified transposed DNA was fully amplified using the previous  
716 parameters with the additional cycle number determined from the qPCR side reaction. The  
717 amplified, transposed DNA was purified using AMPure XP beads (A63881, Beckman Coulter)  
718 and sequenced using an Illumina NextSeq2000, generating 150 bp Paired-End reads.

719

### 720 **ATAC-Seq Analyses**

721 After removing the adapters, the sequences were aligned to the reference hg19, using  
722 Burrows-Wheeler Alignment tool (BWA), with the MEM algorithm<sup>91</sup>. Aligned reads were  
723 filtered based on mapping quality (MAPQ > 10) to restrict our analysis to higher quality and  
724 likely uniquely mapped reads, and PCR duplicates were removed. All mapped reads were  
725 offset by +4 bp for the forward strand and -5 bp for the reverse strand. We called peaks using  
726 MACS2<sup>92</sup>, at 5% FDR, with default parameters. We analyzed differential genome accessibility  
727 using DESeq2<sup>89</sup>, with the following model: design = ~condition, where condition indicates  
728 either CTRL or Alzheimer's disease (FAD or SAD) lines. R v3.3.1. and BEDtools v2.27.1<sup>93</sup> were  
729 used for all comparative TEs analyses.

730

### 731 **Statistical and genomic analyses**

732 All statistical analyses were performed using R v3.3.1. BEDtools v2.27.1<sup>93</sup> was used for  
733 genomic studies. Pathway analysis was performed with WEB-based GENE SeT AnaLysis Toolkit  
734 (<http://www.webgestalt.org>). Motif analyses were performed using the MEME-Suite<sup>95</sup>,  
735 specifically with the MEME-ChIP application. Fasta files of the regions of interest were  
736 produced using BEDTools v2.27.1. Shuffled input sequences were used as background. E-  
737 values < 0.001 were used the threshold for significance. All described results (qPCR analyses  
738 and Immunofluorescences) are representative of at least three independent experiments  
739 unless specifically stated otherwise. Data were presented as average ± SEM. Statistical  
740 analysis was performed using Excel (Microsoft) or GraphPad Prism 8 software (GraphPad).  
741 Student's t-test was used for the comparison between two groups. A value of P < 0.05 was

742 considered significant; \*P < 0.05; \*\*P < 0.01; \*\*\*P < 0.001; \*\*\*\*P < 0.0001; n.s. , not  
 743 significant.

744

745

746 **Extended Data**

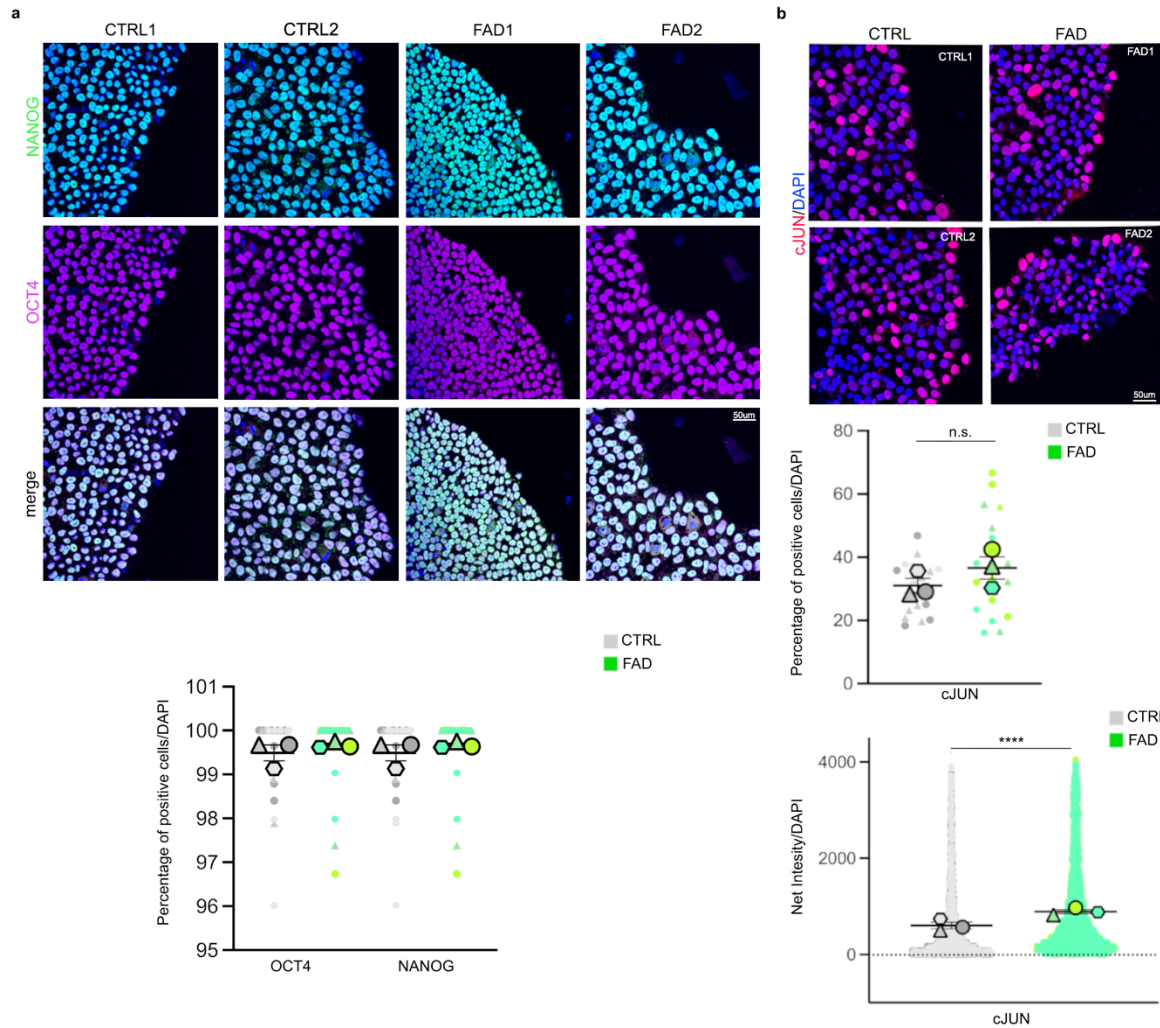

747

748 Extended Data Figure 1. **Pluripotency and JUN expression profiles of CTRL and FAD-derived**

749 **iPSCs. a. and b.** Immunofluorescence quantifying the expression of a. pluripotency markers

750 OCT4 (purple) and NANOG (green) and b. endogenous c-JUN in iPSCs derived from CTRLs and

751 FAD. The quantification of immunofluorescence in panel b is reported as the percentage of

752 expressing cells (upper superplot) and expression of Net Intensity (bottom superplot).

753

754

755

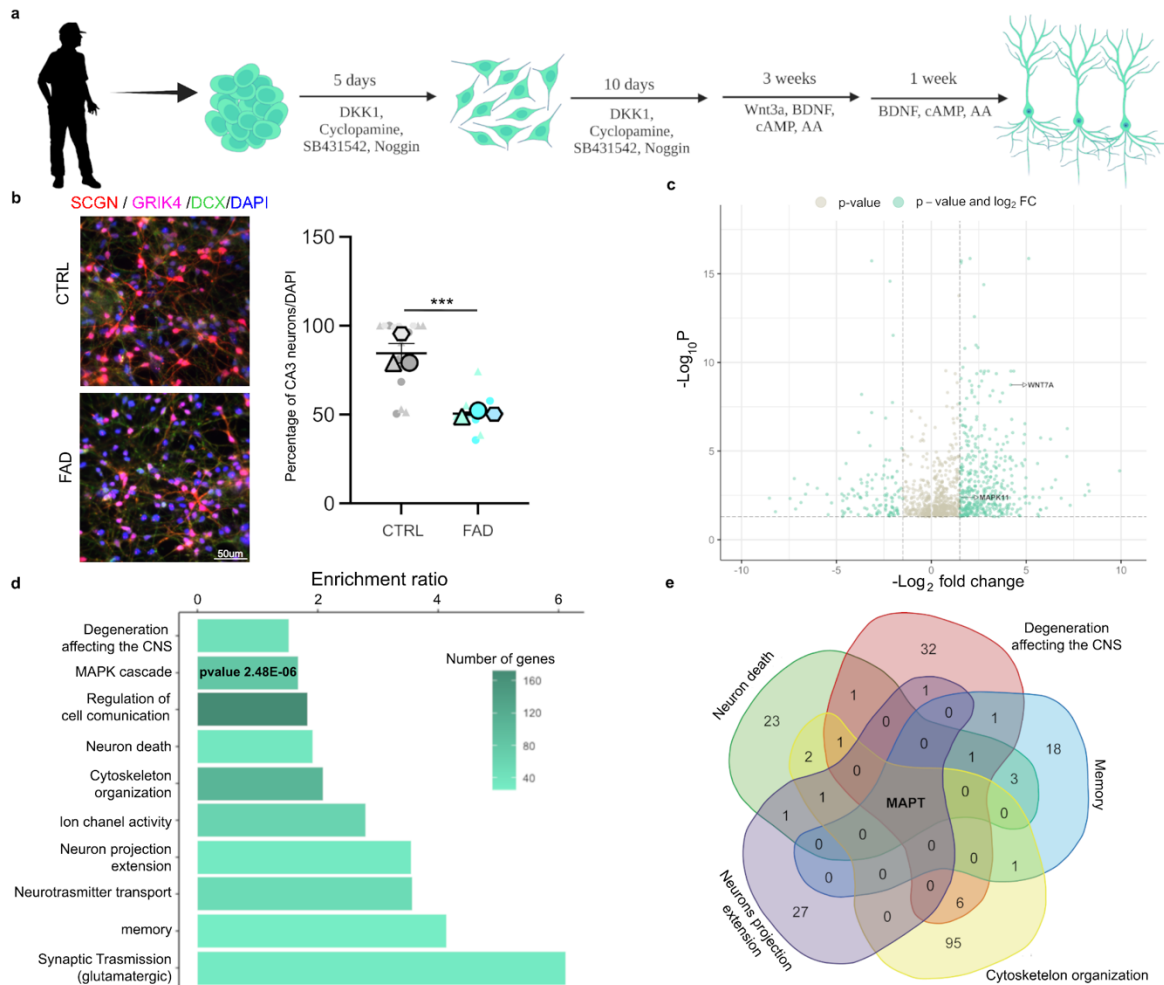

756

757 Extended Data Figure 2. **Dysregulated transcriptional networks and pathways in FAD CA3**

758 **hippocampal neurons.** **a.** A scheme of the protocol for CA3 hippocampal neuron

759 differentiation (made with Biorender.com). **b.** Immunofluorescence for CA3 neuron markers.

760 GRIK4 (pink) and SCGN (red) were expressed in CTRL and FAD neurons demonstrating their

761 proper differentiation. The relative quantification shows that FAD hpNPCs failed to

762 differentiate into CA3 neurons as demonstrated by the reduced number of SCGN- and GRIK4-

763 positive cells in the FAD neuron culture. Scale bar 50um, 40X magnification. DAPI staining on

764 nuclei in blue. **c.** Volcano plot displaying the 1,105 differentially expressed genes in FAD CA3

765 neurons relative to CTRL CA3 neurons. Teal = differentially expressed genes passing

766 significance thresholds  $p\text{-value} < 0.05$  and  $\log_2(\text{fold-change}) \pm 1.5$ ; Gray = differentially

767 expressed genes passing significance threshold of  $p\text{-value} < 0.05$ . **d.** Enriched pathways

768 associated with the 1,105 differentially expressed genes in FAD CA3 neurons predicted by

769 WebGestalt. **e.** Venn diagram showing the genes shared across five enriched pathways in AD.

770 (venn diagram was made using <https://bioinformatics.psb.ugent.be>).

771  
772

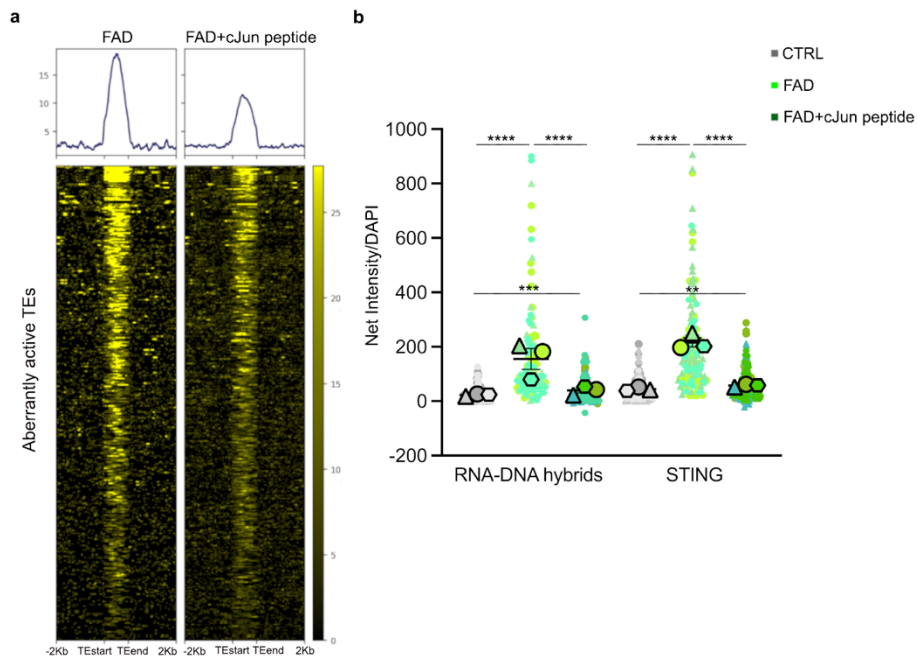

773

774 Extended Data Figure 3. **TE activation induces RNA-DNA hybrid accumulation triggering the**  
775 **cGAS-STING cascade and apoptosis in FAD hpNPCs.** **a.** Heatmap showing a reduction in the  
776 number of open regions of chromatin in FAD+c-JUN peptide at aberrantly active TEs. **b.**  
777 Quantification of the immunofluorescences in Figure 4a.

778

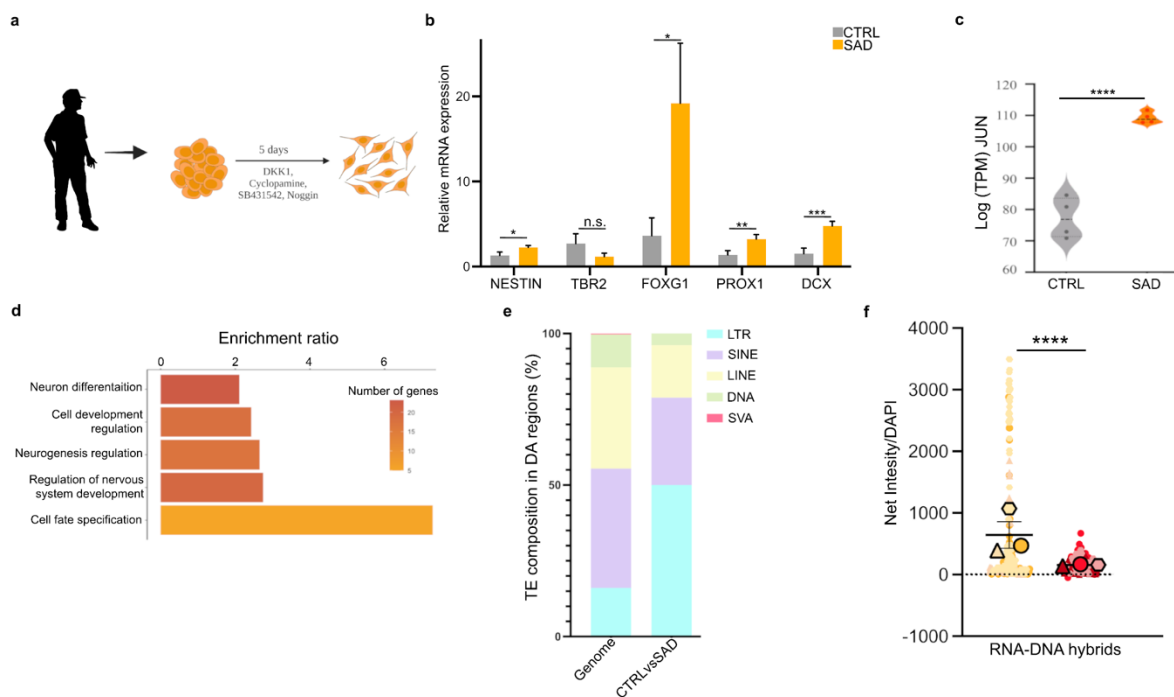

779

780 Extended Data Figure 4. **SAD iPSC-derived hippocampal neural progenitors display impaired**  
781 **neurogenesis, gene expression dysregulation, and aberrant activation of TEs.** **a.** The scheme  
782 of the protocol for hpNPC differentiation (made with Biorender.com). **b.** qPCR analysis for  
783 hpNPC population markers. NESTIN – early precursors; TBR2/FOXP1 – intermediate  
784 progenitors; PROX1 – late progenitors; DCX – neuroblasts. **c.** Violin plot of  $\log_2(\text{TMP})$  for *JUN*  
785 in SAD hpNPCs compared to CTRLs. **d.** Pathways enriched in the 183 differentially expressed  
786 genes (SAD vs CTRL hpNPCs) predicted by WebGestalt. **e.** TE family distribution of the TEs  
787 aberrantly de-repressed in SAD progenitors shows an enrichment for LTRs. **f.** Quantification  
788 of the immunofluorescences in Figure 7a.  
789

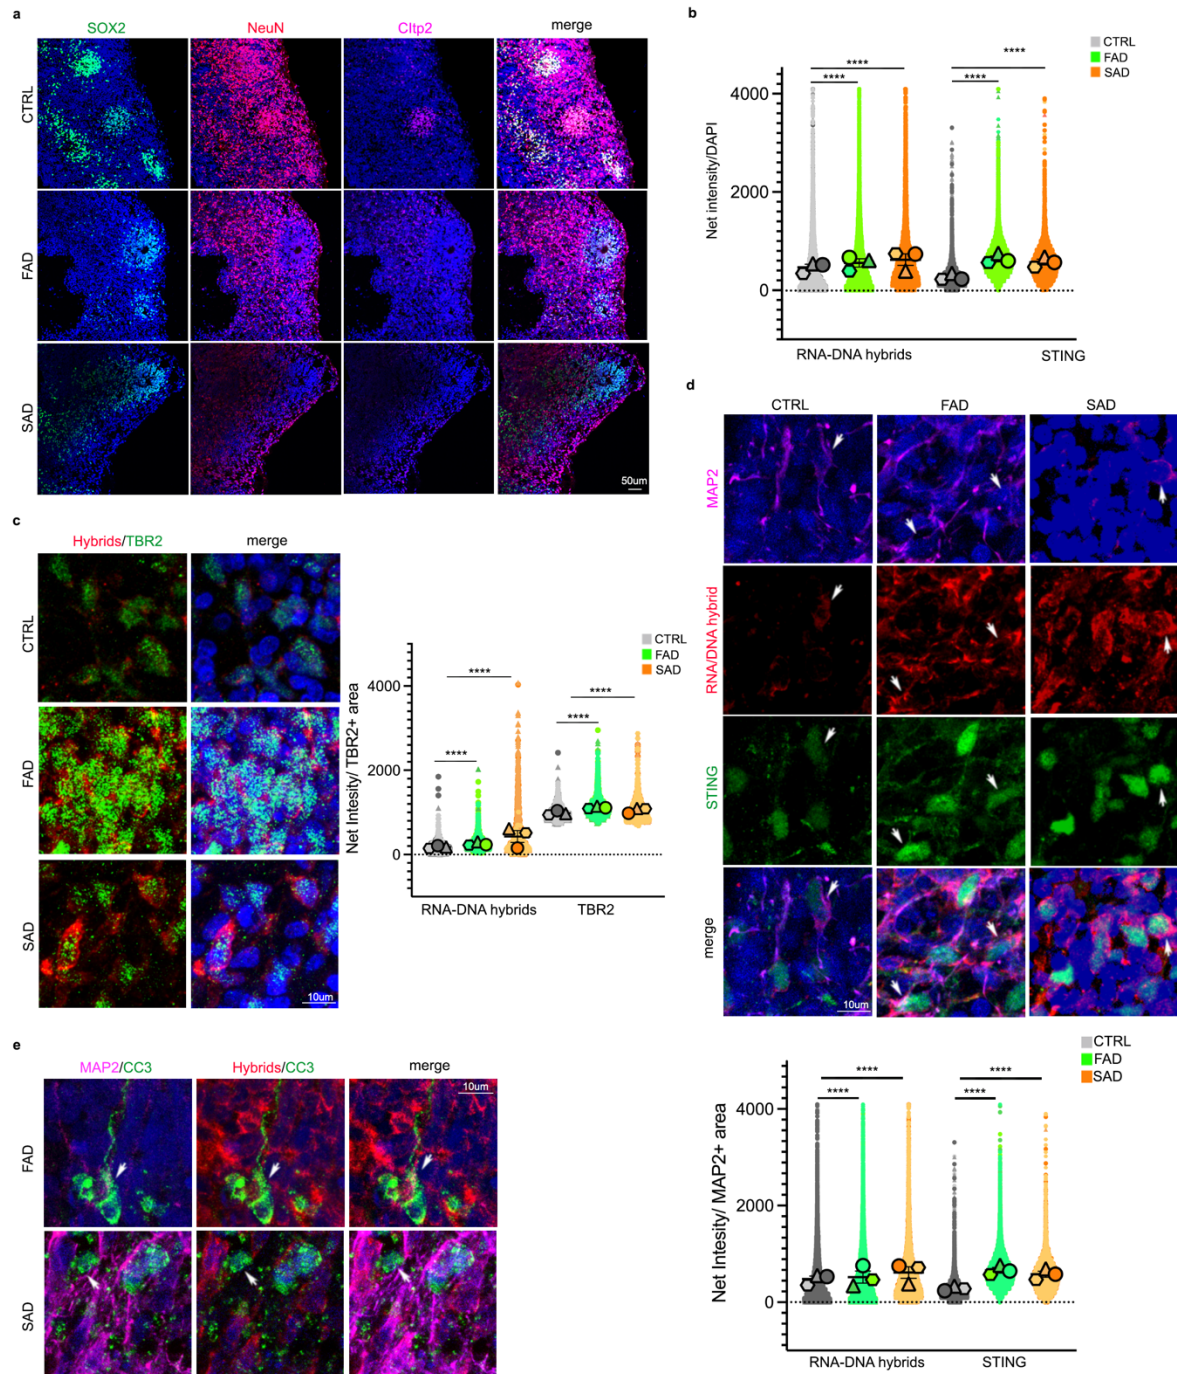

790

791 Extended Data Figure 5. **Characterization of TE-derived RNA-DNA hybrids inducing the cGAS-**

792 **STING cell-death axis in AD cerebral organoids.** **a.** Immunofluorescence for progenitors

793 (SOX2, green signal), immature neurons (NeuN, red signal), and mature neurons (Citp2, pink

794 signal) in CTRL and AD (FAD and SAD) organoids. Scale bar 50um, 20X magnification. DAPI

795 staining on nuclei in blue. **b.** Quantification of the immunofluorescences in Figure 7b. **c.**

796 Immunofluorescence for intermediate progenitors (TBR2, green signal) and RNA-DNA hybrids

797 (red signal) in CTRL and AD (FAD and SAD) organoids. Scale bar 10um, 60X magnification 4X



798 digital zoom. DAPI staining on nuclei in blue. **d.** Immunofluorescence for neurons (MAP2, pink  
799 signal) and RNA-DNA hybrids (red signal) and STING (green signal) in CTRL and AD (FAD and  
800 SAD) organoids. Scale bar 10um, 60X magnification 4X digital zoom. DAPI staining on nuclei in  
801 blue. **e.** Immunofluorescence for neurons (MAP2, pink signal), RNA-DNA hybrids (red signal)  
802 and cleaved caspase 3 (CC3; green signal) in FAD and SAD organoids. White arrows indicate  
803 MAP2/RNA-DNA hybrid/CC3-positive neurons. Scale bar 10um, 60X magnification 4X digital  
804 zoom. DAPI staining on nuclei in blue.

805  
806  
807  
808  
809  
810  
811  
812  
813  
814  
815  
816  
817  
818  
819  
820  
821  
822  
823  
824  
825  
826  
827  
828  
829  
830  
831  
832  
833  
834  
835  
836  
837  
838  
839  
840  
841

842 **Extended Data Table1.** TMPs values of genes involved in the WNT pathway that are  
 843 differentially expressed in FAD hpNPCs.  
 844

|       | CTRL       | FAD        |
|-------|------------|------------|
| DKK1  | 3.692171   | 9.72627767 |
| DKK3  | 57.7179857 | 223.367699 |
| JUN   | 77.3016    | 109.701667 |
| RAC2  | 6.636084   | 51.6482917 |
| RORA  | 2.65834244 | 7.06845833 |
| SFRP4 | 0.8792335  | 14.3325863 |
| WNT2  | 0.01490205 | 3.81743227 |
| WNT5A | 59.2553505 | 204.736115 |
| WNT7A | 0.0380094  | 0.7898473  |

845  
 846  
 847 **Extended Data Table2.** List of 83 completely rescued genes after the inhibition of c-JUN  
 848 phosphorylation.  
 849

| Rescued gene after inhibition |             |              |            |
|-------------------------------|-------------|--------------|------------|
| Down-regulated                |             | Up-regulated |            |
| gene                          | p-value     | gene         | p-value    |
| SLC38A5                       | 1.13E-08    | AC055839.2   | 0.00503467 |
| PIK3AP1                       | 0.024016038 | ACHE         | 0.00089729 |
| SECTM1                        | 5.33E-09    | ACSM3        | 0.02013152 |
| MFAP3L                        | 0.007974303 | ADAMTS18     | 0.02742898 |
| S100A6                        | 0.031978317 | ADD2         | 0.00303124 |
| TUBA4A                        | 0.026239837 | ALKAL2       | 0.00127631 |
| PCDH10                        | 0.004463934 | ANGPT2       | 0.02758469 |
| NPTX1                         | 7.95E-21    | ANKRD7       | 0.02085884 |
| TREX1                         | 0.00041767  | ARHGAP28     | 0.00111001 |
|                               |             | ATCAY        | 0.02859681 |
|                               |             | B4GALNT3     | 0.00414689 |
|                               |             | BMF          | 0.04384791 |
|                               |             | CA14         | 0.03877118 |
|                               |             | CAMK2A       | 0.03274196 |
|                               |             | CCNJL        | 0.04487228 |
|                               |             | CD200        | 0.00474689 |
|                               |             | CFAP65       | 0.0413402  |
|                               |             | CLDN10       | 0.00136135 |
|                               |             | CLDN6        | 0.03073783 |
|                               |             | CNMD         | 8.65E-05   |
|                               |             | CNTNAP2      | 0.0117396  |
|                               |             | CRABP2       | 0.03501695 |
|                               |             | DACT1        | 0.00822037 |
|                               |             | DGKB         | 0.0267694  |
|                               |             | DMRTA1       | 0.04101869 |
|                               |             | DOCK8        | 0.00186351 |
|                               |             | DTX4         | 0.00070423 |
|                               |             | EDNRB        | 0.02369424 |
|                               |             | FAM131B      | 0.01979536 |
|                               |             | FBN3         | 0.01625092 |
|                               |             | FGF13        | 5.58E-05   |
|                               |             | FILIP1       | 0.03914467 |
|                               |             | FREM2        | 0.03102541 |
|                               |             | GABRB3       | 0.02235285 |
|                               |             | GLDC         | 0.00800157 |
|                               |             | GNG2         | 0.00874216 |
|                               |             | GPSM3        | 0.04532086 |
|                               |             | HEPH         | 7.50E-06   |
|                               |             | HFM1         | 0.00807794 |

| Rescued gene after inhibition |         |              |            |
|-------------------------------|---------|--------------|------------|
| Down-regulated                |         | Up-regulated |            |
| gene                          | p-value | gene         | p-value    |
|                               |         | KANK3        | 0.0178539  |
|                               |         | KCNF1        | 0.01529909 |
|                               |         | LAMA1        | 0.03469366 |
|                               |         | LRRN1        | 8.23E-05   |
|                               |         | MAST4        | 0.00885933 |
|                               |         | MMP2         | 0.01588443 |
|                               |         | MMP9         | 2.13E-05   |
|                               |         | MUC3A        | 0.0192786  |
|                               |         | MYCL         | 0.00662627 |
|                               |         | NETO1        | 0.03666395 |
|                               |         | NHSL2        | 0.03016325 |
|                               |         | NOVA1        | 0.00992984 |
|                               |         | PAX6         | 0.04879031 |
|                               |         | PCDHGA6      | 0.02520056 |
|                               |         | PECAM1       | 0.00082268 |
|                               |         | PLCXD3       | 0.0266378  |
|                               |         | PLD6         | 0.033868   |
|                               |         | PMEL         | 0.0049156  |
|                               |         | PNMA8C       | 0.0001973  |
|                               |         | PTPRN        | 6.99E-10   |
|                               |         | RCAN2        | 0.038785   |
|                               |         | RIMS2        | 0.0010725  |
|                               |         | SCUBE1       | 0.01658889 |
|                               |         | SDR42E1      | 0.00675173 |
|                               |         | SHC2         | 0.02540905 |
|                               |         | SLC25A34     | 0.03083753 |
|                               |         | SLC2A12      | 0.00041463 |
|                               |         | THBS3        | 0.02950207 |
|                               |         | TMEM130      | 0.02207853 |
|                               |         | TMEM178A     | 3.43E-09   |
|                               |         | USHBP1       | 0.0487373  |
|                               |         | YPEL1        | 7.85E-06   |
|                               |         | ZNF521       | 0.00968316 |
|                               |         | ZNF662       | 0.04882    |
|                               |         | ZSCAN10      | 0.0348837  |

884

885 **Extended data Table 3.** Table of antibodies used.

886

| Antibody                                                                                                      | Specificity       | Host specie | Dilution              | Supplier                    | Reference    |
|---------------------------------------------------------------------------------------------------------------|-------------------|-------------|-----------------------|-----------------------------|--------------|
| OCT4 (MOUSE)<br>Clone 3A2A20<br>unconjugated                                                                  | OCT4              | mouse       | 1:200                 | StemCell Technologies       | 60093        |
| Human Nanog<br>Antibody                                                                                       | NANOG             | goat        | 1:20                  | R&D Systems                 | AF1997       |
| c-Jun Monoclonal<br>Antibody (4H9)                                                                            | cJUN              | mouse       | 1:1000 WB             | Fisher                      | MA5-15889    |
| Anti-h nestin AF488<br>25 ug                                                                                  | NESTIN            | mouse       | 1:200                 | Invitrogen                  | 5016830      |
| Tbr2 Abcam<br>antibody                                                                                        | TBR2              | rabbit      | 1:200                 | Abcam                       | ab216870     |
| Phospho-c-Jun<br>(Ser73) Polyclonal<br>Antibody                                                               | Phospho cJUN      | rabbit      | 1:1000                | Fisher                      | #44-292G     |
| S9.6                                                                                                          | RNA-DNA hybrids   | mouse       | 1:500                 | Kerafast                    | ENH001       |
| STING Polyclonal<br>Antibody                                                                                  | STING             | rabbit      | 1:100 IF<br>1:1000 WB | ThermoFisher                | PA5-23381    |
| Cleaved Caspase-3<br>(Asp175) (5A1E)<br>Rabbit antibody                                                       | Cleaved caspase 3 | rabbit      | 1:200 IF<br>1:1000 WB | CellSignaling               | 9664T        |
| SCGN Polyclonal<br>Antibody                                                                                   | SCGN              | rabbit      | 1:250                 | Fisher                      | PA5-30393    |
| GRIK4 Monoclonal<br>Antibody (8H5G5)                                                                          | GRIK4             | mouse       | 1:100                 | Fisher                      | MA5-31745    |
| Goat Polyclonal<br>Doublecortin<br>antibody                                                                   | DCX               | goat        | 1:200                 | Rockland Immunochemicals    | 600-101-MH8  |
| AB5603   Anti-Sox2<br>(rabbit polyclonal)                                                                     | SOX2              | rabbit      | 1:1000                | EMD Millipore               | AB5603-100UG |
| RBFOX3/NeuN<br>Antibody (1B7)                                                                                 | NeuN              | mouse       | 1:1000                | Novus Biologicals           | NBP1-92693   |
| Mabe1045   Anti-<br>CTIP2/BCL11B<br>Antibody, clone<br>25B6, Anti-<br>CTIP2/BCL11B<br>Antibody, clone<br>25B6 | Cipt2             | rat         | 1:1000                | EMD Millipore               | MABE1045     |
| Anti-cGAS Antibody                                                                                            | cGAS              | rabbit      | 1:1000                | Millipore Sigma             | ABF124       |
| MAP2 antibody                                                                                                 | MAP2              | chicken     | 1:1000                | Novus Biologicals           | NB300-213    |
| GAPDH antibody<br>(rabbit) D16H11                                                                             | GADPH             | rabbit      | 1:1000                | Cell Signaling Technologies | 5174S        |
| c-Jun (60A8) Rabbit<br>mAb                                                                                    | cJUN              | rabbit      | 1:200 IF              | Cell Signaling Technologies | 9165         |
| Horse Anti-mouse<br>IgG, HRP-linked                                                                           | mouse IgG         | horse       | 1:10000               | Cell Signaling Technologies | 7076S        |
| Anti-rabbit IgG,<br>HRP-linked                                                                                | rabbit IgG        | goat        | 1:10000               | Cell Signaling Technologies | 7074S        |
| Cy™3 AffiniPure<br>Donkey Anti-Rabbit<br>IgG (H+L)                                                            | rabbit IgG        | Donkey      | 1:250                 | Jackson ImmunoResearch      | 711-165-152  |
| Alexa Fluor® 594<br>AffiniPure Donkey<br>Anti-Mouse IgG<br>(H+L)                                              | mouse IgG         | Donkey      | 1:500                 | Jackson ImmunoResearch      | 715-585-150  |

|                                                         |             |        |        |                        |             |
|---------------------------------------------------------|-------------|--------|--------|------------------------|-------------|
| Alexa Fluor® 488 AffiniPure Donkey Anti-Rabbit IgG      | rabbit IgG  | Donkey | 1:500  | Jackson ImmunoResearch | 711-545-152 |
| Alexa Fluor® 488 AffiniPure Donkey Anti-Goat IgG (H+L)  | Goat IgG    | Donkey | 1:500  | Jackson ImmunoResearch | 705-545-003 |
| Alexa Fluor® 647 AffiniPure Donkey Anti-Mouse IgG (H+L) | mouse IgG   | Donkey | 1:500  | Jackson ImmunoResearch | 715-605-150 |
| Goat anti-chicken IgY (H+T) Alexa Fluor Plus 647        | Chicken IgG | Goat   | 1:1000 | Invitrogen             | A32933      |
| Alexa Fluor® 647 AffiniPure Donkey Anti-Rat IgG (H+L)   | Rat IgG     | Donkey | 1:500  | Jackson ImmunoResearch | 712-605-150 |

887

888

889

890

891

**Extended Data Table 4.** List of primers used for qRT-PCR analysis.

| Primer name   | sequence                  |
|---------------|---------------------------|
| HERVK env fwd | GCTGCCCTGCCAACCTGAG       |
| HERVK env rev | CCTGAGTGACATCCCGCTTACC    |
| HERVK gag fwd | AAATAAGACCCAACCGCCAGTAGC  |
| HERVK gag rev | GAATTGCCATGCCTCAGTATCTCC  |
| HERVK pro fwd | GCCGATGAAAAAGCCCGTAAGG    |
| HERVK pro rev | TTGACACTCAGGATTGGCGTTTTTC |
| LTR5HS fwd    | GGGCAGCAACTACTGCTTTGT     |
| LTR5HS rev    | CAATAGTGGGGAGAGGGTCA      |
| L1 ORF1 fwd   | CTCGGCAGAAACCCTACAAG      |
| L1 ORF1 rev   | CCATGTTTAGCGCTTCCTTC      |
| LH1 fwd       | AAAGACACATGCACWCRTATGTT   |
| LH2 rev       | TTTCTCAYTYATAGGTGGGA      |
| LH2 fwd       | CATGGAATAYTATGCAGCCATAAA  |
| LH3 rev       | TCCCACCTATRARTGAGAA       |
| NES fwd       | CTTTCAGGACCCAAGCTGGA      |
| NES rev       | CAGGTGTCTCAAGGGTAGCAG     |
| TBR2 fwd      | ACCTTCTCCAGCGTGTGAG       |
| TBR2 rev      | TCCTCGTACCTCTTGCTCCT      |
| FOXG1 fwd     | AGAAGAACGGCAAGTACGAGA     |
| FOXG1 rev     | TGTTGAGGGACAGATTGTGGC     |
| PROX1 fwd     | GACTTTGAGGTTCCAGAGAGA     |
| PROX1 rev     | TGTAGGCAGTTCGGGGATTTG     |
| DCX fwd       | TCAGGGAGTGCATTACATTTAC    |
| DCX rev       | GTTGGGATTGACATTCTTGGTG    |

|         |                      |
|---------|----------------------|
| 18S fwd | ATACATGCCGACGGGCGCTG |
| 18S rev | AGGGGCTGACCGGGTTGGTT |

892  
893

## 894 **References**

- 895 1. Soria Lopez, J. A., González, H. M. & Léger, G. C. Chapter 13 - Alzheimer's disease. in  
896 *Handbook of Clinical Neurology* (eds. Dekosky, S. T. & Asthana, S.) vol. 167 231–255  
897 (Elsevier, 2019).
- 898 2. Villain, N. & Dubois, B. Alzheimer's Disease Including Focal Presentations. *Semin. Neurol.*  
899 **39**, 213–226 (2019).
- 900 3. Lane, C. A., Hardy, J. & Schott, J. M. Alzheimer's disease. *Eur. J. Neurol.* **25**, 59–70 (2018).
- 901 4. Serrano-Pozo, A., Frosch, M. P., Masliah, E. & Hyman, B. T. Neuropathological  
902 Alterations in Alzheimer Disease. *Cold Spring Harb. Perspect. Med.* **1**, a006189 (2011).
- 903 5. Braak, H., Braak, E. & Bohl, J. Staging of Alzheimer-Related Cortical Destruction. *Eur.*  
904 *Neurol.* **33**, 403–408 (1993).
- 905 6. Eriksson, P. S. *et al.* Neurogenesis in the adult human hippocampus. *Nat. Med.* **4**, 1313–  
906 1317 (1998).
- 907 7. Gage, F. H. Mammalian Neural Stem Cells. *Science* **287**, 1433–1438 (2000).
- 908 8. Merkle, F. T. & Alvarez-Buylla, A. Neural stem cells in mammalian development. *Curr.*  
909 *Opin. Cell Biol.* **18**, 704–709 (2006).
- 910 9. Andreotti, J. P. *et al.* Neural stem cell niche heterogeneity. *Semin. Cell Dev. Biol.* **95**, 42–  
911 53 (2019).
- 912 10. Steiner, B., Wolf, S. A. & Kempermann, G. Adult neurogenesis and neurodegenerative  
913 disease. *Regen. Med.* **1**, 15–28 (2006).
- 914 11. Shruster, A., Melamed, E. & Offen, D. Neurogenesis in the aged and neurodegenerative  
915 brain. *Apoptosis* **15**, 1415–1421 (2010).

- 916 12. Mu, Y. & Gage, F. H. Adult hippocampal neurogenesis and its role in Alzheimer's disease.  
917 *Mol. Neurodegener.* **6**, 85 (2011).
- 918 13. Winner, B. & Winkler, J. Adult Neurogenesis in Neurodegenerative Diseases. *Cold Spring*  
919 *Harb. Perspect. Biol.* **7**, a021287 (2015).
- 920 14. Moreno-Jiménez, E. P. *et al.* Adult hippocampal neurogenesis is abundant in  
921 neurologically healthy subjects and drops sharply in patients with Alzheimer's disease.  
922 *Nat. Med.* **25**, 554–560 (2019).
- 923 15. Tobin, M. K. *et al.* Human Hippocampal Neurogenesis Persists in Aged Adults and  
924 Alzheimer's Disease Patients. *Cell Stem Cell* **24**, 974-982.e3 (2019).
- 925 16. Sung, P.-S., Lin, P.-Y., Liu, C.-H., Su, H.-C. & Tsai, K.-J. Neuroinflammation and  
926 Neurogenesis in Alzheimer's Disease and Potential Therapeutic Approaches. *Int. J. Mol.*  
927 *Sci.* **21**, 701 (2020).
- 928 17. Fuster-Matanzo, A., Llorens-Martín, M., Jurado-Arjona, J., Avila, J. & Hernández, F. Tau  
929 Protein and Adult Hippocampal Neurogenesis. *Front. Neurosci.* **6**, 104 (2012).
- 930 18. Zheng, J. *et al.* Interneuron Accumulation of Phosphorylated tau Impairs Adult  
931 Hippocampal Neurogenesis by Suppressing GABAergic Transmission. *Cell Stem Cell* **26**,  
932 331-345.e6 (2020).
- 933 19. Babcock, K. R., Page, J. S., Fallon, J. R. & Webb, A. E. Adult Hippocampal Neurogenesis in  
934 Aging and Alzheimer's Disease. *Stem Cell Rep.* **16**, 681–693 (2021).
- 935 20. Li, M. & Qian, S. Gastrodin Protects Neural Progenitor Cells Against Amyloid  $\beta$  (1–42)-  
936 Induced Neurotoxicity and Improves Hippocampal Neurogenesis in Amyloid  $\beta$  (1–42)-  
937 Injected Mice. *J. Mol. Neurosci.* **60**, 21–32 (2016).

- 938 21. Bartolome, F. *et al.* Amyloid  $\beta$ -induced impairments on mitochondrial dynamics,  
939 hippocampal neurogenesis, and memory are restored by phosphodiesterase 7  
940 inhibition. *Alzheimers Res. Ther.* **10**, 24 (2018).
- 941 22. Li Puma, D. D. *et al.* Herpes Simplex Virus Type-1 Infection Impairs Adult Hippocampal  
942 Neurogenesis via Amyloid- $\beta$  Protein Accumulation. *Stem Cells* **37**, 1467–1480 (2019).
- 943 23. Faigle, R. *et al.* ASK1 Inhibits Astroglial Development via p38 Mitogen-Activated Protein  
944 Kinase and Promotes Neuronal Differentiation in Adult Hippocampus-Derived Progenitor  
945 Cells. *Mol. Cell. Biol.* **24**, 280–293 (2004).
- 946 24. Kim, J. H. *et al.* Retrovirally transduced NCAM140 facilitates neuronal fate choice of  
947 hippocampal progenitor cells. *J. Neurochem.* **94**, 417–424 (2005).
- 948 25. Milosevic, J. *et al.* Uracil nucleotides stimulate human neural precursor cell proliferation  
949 and dopaminergic differentiation: involvement of MEK/ERK signalling. *J. Neurochem.* **99**,  
950 913–923 (2006).
- 951 26. Xiao, Z. *et al.* Upregulation of Flk-1 by bFGF via the ERK pathway is essential for VEGF-  
952 mediated promotion of neural stem cell proliferation. *Cell Res.* **17**, 73–79 (2007).
- 953 27. Costello, D. A. & Herron, C. E. The role of c-Jun N-terminal kinase in the A $\beta$ -mediated  
954 impairment of LTP and regulation of synaptic transmission in the hippocampus.  
955 *Neuropharmacology* **46**, 655–662 (2004).
- 956 28. Yao, M., Nguyen, T.-V. V. & Pike, C. J.  $\beta$ -Amyloid-Induced Neuronal Apoptosis Involves c-  
957 Jun N-Terminal Kinase-Dependent Downregulation of Bcl-w. *J. Neurosci.* **25**, 1149–1158  
958 (2005).
- 959 29. Kim, E. K. & Choi, E.-J. Compromised MAPK signaling in human diseases: an update.  
960 *Arch. Toxicol.* **89**, 867–882 (2015).

- 961 30. Irwin, M. *et al.* A Positive Feedback Loop of Hippo- and c-Jun-Amino-Terminal Kinase  
962 Signaling Pathways Regulates Amyloid-Beta-Mediated Neurodegeneration. *Front. Cell*  
963 *Dev. Biol.* **8**, 117 (2020).
- 964 31. Lagalwar, S., Guillozet-Bongaarts, A. L., Berry, R. W. & Binder, L. I. Formation of  
965 Phospho-SAPK/JNK Granules in the Hippocampus Is an Early Event in Alzheimer Disease.  
966 *J. Neuropathol. Exp. Neurol.* **65**, 455–464 (2006).
- 967 32. Yarza, R., Vela, S., Solas, M. & Ramirez, M. J. c-Jun N-terminal Kinase (JNK) Signaling as a  
968 Therapeutic Target for Alzheimer’s Disease. *Front. Pharmacol.* **6**, 321 (2016).
- 969 33. Miloso, M., Scuteri, A., Foudah, D. & Tredici, G. MAPKs as Mediators of Cell Fate  
970 Determination: an Approach to Neurodegenerative Diseases. *Curr. Med. Chem.* **15**, 538–  
971 48 (2008).
- 972 34. Shaulian, E. & Karin, M. AP-1 as a regulator of cell life and death. *Nat. Cell Biol.* **4**, E131–  
973 E136 (2002).
- 974 35. Vierbuchen, T. *et al.* AP-1 transcription factors and the SWI/SNF complex mediate signal-  
975 dependent enhancer selection. *Mol. Cell* **68**, 1067-1082.e12 (2017).
- 976 36. Gao, F. *et al.* Heterozygous mutations in SMARCA2 reprogram the enhancer landscape  
977 by global retargeting of SMARCA4. *Mol. Cell* **75**, 891-904.e7 (2019).
- 978 37. Zhang, C. *et al.* ATF3 drives senescence by reconstructing accessible chromatin profiles.  
979 *Aging Cell* **20**, e13315 (2021).
- 980 38. Sclip, A. *et al.* c-Jun N-terminal kinase has a key role in Alzheimer disease synaptic  
981 dysfunction in vivo. *Cell Death Dis.* **5**, e1019–e1019 (2014).
- 982 39. Li, W. *et al.* Activation of transposable elements during aging and neuronal decline in  
983 *Drosophila*. *Nat. Neurosci.* **16**, 529–531 (2013).



- 984 40. Frost, B., Hemberg, M., Lewis, J. & Feany, M. B. Tau promotes neurodegeneration  
985 through global chromatin relaxation. *Nat. Neurosci.* **17**, 357–366 (2014).
- 986 41. Krug, L. *et al.* Retrotransposon activation contributes to neurodegeneration in a  
987 *Drosophila* TDP-43 model of ALS. *PLoS Genet.* **13**, e1006635 (2017).
- 988 42. Protasova, M. S. *et al.* Quantitative analysis of L1-retrotransposons in Alzheimer’s  
989 disease and aging. *Biochem. Mosc.* **82**, 962–971 (2017).
- 990 43. Guo, C. *et al.* Tau Activates Transposable Elements in Alzheimer’s Disease. *Cell Rep.* **23**,  
991 2874–2880 (2018).
- 992 44. Chang, Y.-H., Keegan, R. M., Prazak, L. & Dubnau, J. Cellular labeling of endogenous  
993 retrovirus replication (CLEVR) reveals de novo insertions of the gypsy retrotransposable  
994 element in cell culture and in both neurons and glial cells of aging fruit flies. *PLoS Biol.*  
995 **17**, e3000278 (2019).
- 996 45. Tam, O. H. *et al.* Postmortem Cortex Samples Identify Distinct Molecular Subtypes of  
997 ALS: Retrotransposon Activation, Oxidative Stress, and Activated Glia. *Cell Rep.* **29**, 1164-  
998 1177.e5 (2019).
- 999 46. Tam, O. H., Ostrow, L. W. & Gale Hammell, M. Diseases of the nERVous system:  
1000 retrotransposon activity in neurodegenerative disease. *Mob. DNA* **10**, 32 (2019).
- 1001 47. Yu, D. X. *et al.* Modeling Hippocampal Neurogenesis Using Human Pluripotent Stem  
1002 Cells. *Stem Cell Rep.* **2**, 295–310 (2014).
- 1003 48. Niklison-Chirou, M. V., Agostini, M., Amelio, I. & Melino, G. Regulation of Adult  
1004 Neurogenesis in Mammalian Brain. *Int. J. Mol. Sci.* **21**, 4869 (2020).
- 1005 49. Boonen, R. A. C. M., van Tijn, P. & Zivkovic, D. Wnt signaling in Alzheimer’s disease: up or  
1006 down, that is the question. *Ageing Res. Rev.* **8**, 71–82 (2009).

- 1007 50. Purro, S. A., Galli, S. & Salinas, P. C. Dysfunction of Wnt signaling and synaptic  
1008 disassembly in neurodegenerative diseases. *J. Mol. Cell Biol.* **6**, 75–80 (2014).
- 1009 51. Inestrosa, N. C. & Varela-Nallar, L. Wnt signaling in the nervous system and in  
1010 Alzheimer’s disease. *J. Mol. Cell Biol.* **6**, 64–74 (2014).
- 1011 52. De Ferrari, G. V. *et al.* Wnt/ $\beta$ -catenin signaling in Alzheimer’s disease. *CNS Neurol.*  
1012 *Disord. Drug Targets* **13**, 745–754 (2014).
- 1013 53. Tapia-Rojas, C. & Inestrosa, N. C. Loss of canonical Wnt signaling is involved in the  
1014 pathogenesis of Alzheimer’s disease. *Neural Regen. Res.* **13**, 1705–1710 (2018).
- 1015 54. Jia, L., Piña-Crespo, J. & Li, Y. Restoring Wnt/ $\beta$ -catenin signaling is a promising  
1016 therapeutic strategy for Alzheimer’s disease. *Mol. Brain* **12**, 104 (2019).
- 1017 55. Narvaes, R. F. & Furini, C. R. G. Role of Wnt signaling in synaptic plasticity and memory.  
1018 *Neurobiol. Learn. Mem.* **187**, 107558 (2022).
- 1019 56. Lie, D.-C. *et al.* Wnt signalling regulates adult hippocampal neurogenesis. *Nature* **437**,  
1020 1370–1375 (2005).
- 1021 57. Kuwabara, T. *et al.* Wnt-mediated activation of NeuroD1 and retro-elements during  
1022 adult neurogenesis. *Nat. Neurosci.* **12**, 1097–1105 (2009).
- 1023 58. Karalay, Ö. *et al.* Prospero-related homeobox 1 gene (Prox1) is regulated by canonical  
1024 Wnt signaling and has a stage-specific role in adult hippocampal neurogenesis. *Proc.*  
1025 *Natl. Acad. Sci.* **108**, 5807–5812 (2011).
- 1026 59. Okamoto, M. *et al.* Reduction in paracrine Wnt3 factors during aging causes impaired  
1027 adult neurogenesis. *FASEB J.* **25**, 3570–3582 (2011).
- 1028 60. Miranda, C. J. *et al.* Aging Brain Microenvironment Decreases Hippocampal  
1029 Neurogenesis Through Wnt-Mediated Survivin Signaling. *Aging Cell* **11**, 542–552 (2012).

- 1030 61. Qu, Q. *et al.* Wnt7a Regulates Multiple Steps of Neurogenesis. *Mol. Cell. Biol.* **33**, 2551–  
1031 2559 (2013).
- 1032 62. Zhu, Y. *et al.* Phosphatase WIP1 regulates adult neurogenesis and WNT signaling during  
1033 aging. *J. Clin. Invest.* **124**, 3263–3273 (2014).
- 1034 63. Mardones, M. D. *et al.* Frizzled-1 receptor regulates adult hippocampal neurogenesis.  
1035 *Mol. Brain* **9**, 29 (2016).
- 1036 64. Scott, E. L. & Brann, D. W. Estrogen regulation of Dkk1 and Wnt/ $\beta$ -Catenin signaling in  
1037 neurodegenerative disease. *Brain Res.* **1514**, 63–74 (2013).
- 1038 65. Killick, R. *et al.* Clusterin regulates  $\beta$ -amyloid toxicity via Dickkopf-1-driven induction of  
1039 the wnt–PCP–JNK pathway. *Mol. Psychiatry* **19**, 88–98 (2014).
- 1040 66. Silva-Alvarez, C., Arrazola, M., Godoy, J., Ordenes, D. & Inestrosa, N. Canonical Wnt  
1041 signaling protects hippocampal neurons from A $\beta$  oligomers: role of non-canonical Wnt-  
1042 5a/Ca<sup>2+</sup> in mitochondrial dynamics. *Front. Cell. Neurosci.* **7**, (2013).
- 1043 67. Liao, Y., Wang, J., Jaehnig, E. J., Shi, Z. & Zhang, B. WebGestalt 2019: gene set analysis  
1044 toolkit with revamped UIs and APIs. *Nucleic Acids Res.* **47**, W199–W205 (2019).
- 1045 68. Sarkar, A. *et al.* Efficient Generation of CA3 Neurons from Human Pluripotent Stem Cells  
1046 Enables Modeling of Hippocampal Connectivity In Vitro. *Cell Stem Cell* **22**, 684–697.e9  
1047 (2018).
- 1048 69. Naseri, N. N., Wang, H., Guo, J., Sharma, M. & Luo, W. The complexity of tau in  
1049 Alzheimer’s disease. *Neurosci. Lett.* **705**, 183–194 (2019).
- 1050 70. Thal, D. R. & Tomé, S. O. The central role of tau in Alzheimer’s disease: From  
1051 neurofibrillary tangle maturation to the induction of cell death. *Brain Res. Bull.* **190**,  
1052 204–217 (2022).

- 1053 71. Ito, T. *et al.* Identification of SWI-SNF Complex Subunit BAF60a as a Determinant of the  
1054 Transactivation Potential of Fos/Jun Dimers\*. *J. Biol. Chem.* **276**, 2852–2857 (2001).
- 1055 72. Biddie, S. C. *et al.* Transcription Factor AP1 Potentiates Chromatin Accessibility and  
1056 Glucocorticoid Receptor Binding. *Mol. Cell* **43**, 145–155 (2011).
- 1057 73. Xu, Y. Z., Thiraisingam, T., Marino, R. & Radzioch, D. Recruitment of SWI/SNF Complex Is  
1058 Required for Transcriptional Activation of the SLC11A1 Gene during Macrophage  
1059 Differentiation of HL-60 Cells. *J. Biol. Chem.* **286**, 12839–12849 (2011).
- 1060 74. Zhao, Y. *et al.* Transposon-triggered innate immune response confers cancer resistance  
1061 to the blind mole rat. *Nat. Immunol.* **22**, 1219–1230 (2021).
- 1062 75. Cerritelli, S. M. & Crouch, R. J. Ribonuclease H: the enzymes in Eukaryotes. *FEBS J.* **276**,  
1063 1494–1505 (2009).
- 1064 76. Gulen, M. F. *et al.* Signalling strength determines proapoptotic functions of STING. *Nat.*  
1065 *Commun.* **8**, 427 (2017).
- 1066 77. Meyer, K. *et al.* REST and Neural Gene Network Dysregulation in iPSC Models of  
1067 Alzheimer’s Disease. *Cell Rep.* **26**, 1112-1127.e9 (2019).
- 1068 78. Noble, W., Hanger, D., Miller, C. & Lovestone, S. The Importance of Tau Phosphorylation  
1069 for Neurodegenerative Diseases. *Front. Neurol.* **4**, (2013).
- 1070 79. Zhang, J. & Jiao, J. Molecular Biomarkers for Embryonic and Adult Neural Stem Cell and  
1071 Neurogenesis. *BioMed Res. Int.* **2015**, 727542 (2015).
- 1072 80. Poreba, M., Strózyk, A., Salvesen, G. S. & Drag, M. Caspase substrates and inhibitors.  
1073 *Cold Spring Harb. Perspect. Biol.* **5**, a008680 (2013).
- 1074 81. Decout, A., Katz, J. D., Venkatraman, S. & Ablasser, A. The Cgas–Sting Pathway as a  
1075 Therapeutic Target in Inflammatory Diseases. *Nat. Rev. Immunol.* **21**, 548–569 (2021).

- 1076 82. Fryer, A. L., Abdullah, A., Taylor, J. M. & Crack, P. J. The Complexity of the cGAS-STING  
1077 Pathway in CNS Pathologies. *Front. Neurosci.* **15**, (2021).
- 1078 83. Israel, M. A. *et al.* Probing sporadic and familial Alzheimer’s disease using induced  
1079 pluripotent stem cells. *Nature* **482**, 216–220 (2012).
- 1080 84. Cawez, F. *et al.* Combinatorial Design of a Nanobody that Specifically Targets Structured  
1081 RNAs. *J. Mol. Biol.* **430**, 1652–1670 (2018).
- 1082 85. Janczura, K. J. *et al.* Inhibition of HDAC3 reverses Alzheimer’s disease-related  
1083 pathologies in vitro and in the 3xTg-AD mouse model. *Proc. Natl. Acad. Sci. U. S. A.* **115**,  
1084 E111148–E111157 (2018).
- 1085 86. Arnaud, L. *et al.* APOE4 drives inflammation in human astrocytes via TAGLN3 repression  
1086 and NF- $\kappa$ B activation. *Cell Rep.* **40**, 111200 (2022).
- 1087 87. Lancaster, M. A. & Knoblich, J. A. Generation of Cerebral Organoids from Human  
1088 Pluripotent Stem Cells. *Nat. Protoc.* **9**, 2329 (2014).
- 1089 88. Dobin, A. *et al.* STAR: ultrafast universal RNA-seq aligner. *Bioinformatics* **29**, 15–21  
1090 (2013).
- 1091 89. Li, B. & Dewey, C. N. RSEM: accurate transcript quantification from RNA-Seq data with  
1092 or without a reference genome. *BMC Bioinformatics* **12**, 323 (2011).
- 1093 90. Love, M. I., Huber, W. & Anders, S. Moderated estimation of fold change and dispersion  
1094 for RNA-seq data with DESeq2. *Genome Biol.* **15**, 550 (2014).
- 1095 91. Buenrostro, J. D., Giresi, P. G., Zaba, L. C., Chang, H. Y. & Greenleaf, W. J. Transposition  
1096 of native chromatin for multimodal regulatory analysis and personal epigenomics. *Nat.*  
1097 *Methods* **10**, 1213–1218 (2013).
- 1098 92. Li, H. *et al.* The Sequence Alignment/Map format and SAMtools. *Bioinformatics* **25**, 2078  
1099 (2009).

- 1100 93. Zhang, Y. *et al.* Model-based Analysis of CHIP-Seq (MACS). *Genome Biol.* **9**, R137 (2008).
- 1101 94. Quinlan, A. R. & Hall, I. M. BEDTools: a flexible suite of utilities for comparing genomic  
1102 features. *Bioinformatics* **26**, 841–842 (2010).
- 1103 95. Ramírez, F. *et al.* deepTools2: a next generation web server for deep-sequencing data  
1104 analysis. *Nucleic Acids Res.* **44**, W160–W165 (2016).
- 1105 96. Bailey, T. L., Johnson, J., Grant, C. E. & Noble, W. S. The MEME Suite. *Nucleic Acids Res.*  
1106 **43**, W39 (2015).
- 1107
- 1108
- 1109
- 1110
- 1111
- 1112
- 1113
